# Supplementary material for: Genetic and Chemical Correction of Cholesterol Accumulation and Impaired Autophagy in Hepatic and Neural Cells Derived from Niemann-Pick Type C Patient-Specific iPS Cells
Source: PubMed Central journal article supplement — Stem Cell Reports. 2014 May 15;2(6):866–80. doi: 10.1016/j.stemcr.2014.03.014 (PMC4050353; doi:10.1016/j.stemcr.2014.03.014), 2014-05-15
Supplement: mmc2.pdf [file mmc2.pdf]

# Genetic and Chemical Correction of Cholesterol Accumulation and Impaired Autophagy in Hepatic and Neural Cells Derived from Niemann-Pick Type C Patient-Specific iPS Cells

Dorothea Maetzel,<sup>1,5</sup> Sovan Sarkar,<sup>1,5</sup> Haoyi Wang,<sup>1,5</sup> Lina Abi-Mosleh,<sup>2</sup> Ping Xu,<sup>1</sup> Albert W. Cheng,<sup>1</sup> Qing Gao,<sup>1</sup> Maisam Mitalipova,<sup>1</sup> and Rudolf Jaenisch<sup>1,3,4,\*</sup>

<sup>1</sup>Whitehead Institute for Biomedical Research, 9 Cambridge Center, Cambridge, MA 02142, USA

<sup>2</sup>Department of Molecular Genetics, University of Texas Southwestern Medical Center, 5323 Harry Hines Boulevard, Dallas, TX 75390-9046, USA

<sup>3</sup>Skolkovo Institute of Science and Technology (Skoltech), Novaya Street 100, Skolkovo 143025, Moscow Region, Russia

<sup>4</sup>Department of Biology, Massachusetts Institute of Technology, 77 Massachusetts Avenue, Cambridge, MA 02142, USA

<sup>5</sup>Co-first author

\*Correspondence: [jaenisch@wi.mit.edu](mailto:jaenisch@wi.mit.edu)

<http://dx.doi.org/10.1016/j.stemcr.2014.03.014>

This is an open access article under the CC BY-NC-ND license (<http://creativecommons.org/licenses/by-nc-nd/3.0/>).

## SUMMARY

Niemann-Pick type C (NPC) disease is a fatal inherited lipid storage disorder causing severe neurodegeneration and liver dysfunction with only limited treatment options for patients. Loss of NPC1 function causes defects in cholesterol metabolism and has recently been implicated in deregulation of autophagy. Here, we report the generation of isogenic pairs of NPC patient-specific induced pluripotent stem cells (iPSCs) using transcription activator-like effector nucleases (TALENs). We observed decreased cell viability, cholesterol accumulation, and dysfunctional autophagic flux in NPC1-deficient human hepatic and neural cells. Genetic correction of a disease-causing mutation rescued these defects and directly linked NPC1 protein function to impaired cholesterol metabolism and autophagy. Screening for autophagy-inducing compounds in disease-affected human cells showed cell type specificity. Carbamazepine was found to be cytoprotective and effective in restoring the autophagy defects in both NPC1-deficient hepatic and neuronal cells and therefore may be a promising treatment option with overall benefit for NPC disease.

## INTRODUCTION

NPC disease is an inherited, autosomal recessive lysosomal storage disorder caused by loss-of-function mutations primarily in the *NPC1* gene (~95%), leading to severe neurodegeneration and liver dysfunction (Carstea et al., 1997; Millard et al., 2005; Vance and Peake, 2011; Vanier, 2010). NPC1 is a transmembrane protein located on the late endosomal/lysosomal (LE/L) compartments where it regulates cholesterol efflux (Abi-Mosleh et al., 2009; Carstea et al., 1997; Millard et al., 2005). So far, more than 250 different *NPC1* mutations effecting protein expression, function and stability have been identified. The most common mutation associated with the classical juvenile-onset phenotype, *NPC1*<sup>I1061T</sup>, promotes ER-mediated degradation of the mutant protein (Gelsthorpe et al., 2008). Characteristic for NPC disease is the sequestration of low-density lipoprotein (LDL)-derived cholesterol and other lipids in the cellular LE/L compartments due to defective export (Xie et al., 1999). Loss of NPC1 function causes impaired cholesterol homeostasis that has a major impact on liver and brain (Vance and Peake, 2011; Vanier, 2010; Xie et al., 1999).

Autophagy, an intracellular degradation pathway for damaged organelles and aggregation-prone proteins, is essential for cellular homeostasis (Mizushima et al., 2008; Ravikumar et al., 2010). Autophagy regulates lipid meta-

bolism and alterations in intracellular lipid content is likely to impact the autophagy pathway (Singh and Cuervo, 2012; Singh et al., 2009). The degenerative phenotypes in the liver and cerebellum observed in NPC patients resemble those seen in the organs of autophagy-deficient mice (Hara et al., 2006; Komatsu et al., 2006, 2007; Mizushima et al., 2008; Rosenbaum and Maxfield, 2011), suggesting a role of autophagy in the etiology of NPC disease. The dynamic process of autophagy, defined as autophagic flux, encompasses the generation of autophagosomes and its fusion with late endosomes to form amphisomes, which subsequently fuse with lysosomes forming autolysosomes where the autophagic cargo is degraded (Ravikumar et al., 2010). Although impaired autophagy has been shown to contribute to neurodegenerative and liver disorders (Komatsu, 2012; Mizushima et al., 2008; Sarkar, 2013) and is implicated in NPC disease (Erick et al., 2012; Ordoñez et al., 2012; Pacheco et al., 2007; Sarkar et al., 2013), the exact nature of autophagy dysfunction in human NPC disease-affected cells has not been clarified.

The generation of NPC patient-specific induced pluripotent stem cells (iPSCs) provides access to unlimited numbers of disease-affected cell types and a unique opportunity to gain mechanistic insights and screening for new cell type-specific therapeutic compounds (Grskovic et al., 2011; Hara et al., 2006; Kondo et al., 2013; Saha and Jaenisch, 2009; Soldner et al., 2009; Soldner and Jaenisch,

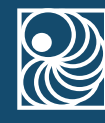**Table 1. Overview of Generated NPC Patient-Specific iPSC Cell Lines and Used ESCs**

| iPS/ES Clone ID      | Parental Cell Line | Donor                                                   | Age of Biopsy (years) | Reprogramming Factors           | Number of Factor-free iPS Clones | Number of iPS Clones Characterized | Cell Line Designation                           |
|----------------------|--------------------|---------------------------------------------------------|-----------------------|---------------------------------|----------------------------------|------------------------------------|-------------------------------------------------|
| NPC1-1 (#4, #13)     | GM18453            | Niemann-Pick disease, type C NPC1 (I1061T/I1061T)       | nk                    | loxP-Tet0-OKSM, loxP-FUW-M2rtTA | 13                               | 2                                  | WIBR-IPS-NPC1 <sup>I1061T/I1061T</sup>          |
| NPC1-2 (#9, #26)     | GM03123            | Niemann-Pick disease, type C NPC1 (P237S/I1061T)        | 9                     | loxP-Tet0-OKSM, loxP-FUW-M2rtTA | 15                               | 2                                  | WIBR-IPS-NPC1 <sup>P237S/I1061T</sup>           |
| NPC1-3 (#4, #47)     | GM22870            | Niemann-Pick disease, type C NPC1 (1920 delG/1009G > A) | 4                     | loxP-Tet0-OKSM, loxP-FUW-M2rtTA | 15                               | 2                                  | WIBR-IPS-NPC1 <sup>1920 delG/1009G &gt; A</sup> |
| NPC1-4 (#17, #20)    | GM22871            | Niemann-Pick disease, type C NPC1 (1920 delG/1009G > A) | 4                     | loxP-Tet0-OKSM, loxP-FUW-M2rtTA | 9                                | 2                                  | WIBR-IPS-NPC1 <sup>1920 delG/1009G &gt; A</sup> |
| Control-1            | hES Cell Line      |                                                         |                       |                                 |                                  |                                    | WIBR3                                           |
| Control-2 (#11, #13) | GM23151            | Niemann-Pick disease, type C NPC1 (1920 delG/wt)        | 39                    | loxP-Tet0-OKSM, loxP-FUW-M2rtTA | 10                               | 2                                  | WIBR-IPS-NPC1 <sup>1920 delG/wt</sup>           |

nk, not known.

2012; Yusa et al., 2011). Isogenic iPSCs that differ exclusively in a single disease-causing genetic mutation enable studying of the disease phenotypes under highly controlled conditions and allow linking the observed defects directly to disease-causing genetic alterations (Soldner et al., 2011).

Here, we report the generation of patient-specific NPC1 iPSCs and isogenic mutant and control cell lines. NPC1 iPSC-derived hepatic and neuronal cells showed reduced cell viability compared to their controls and displayed defects in cholesterol metabolism and impairment in autophagic flux. TALEN-mediated correction of the *NPC1*<sup>I1061T</sup> mutation rescued these disease phenotypes, including dysfunctional autophagic flux, thus implying that the defect in autophagy is directly linked to loss of NPC1 protein function. Screening of small molecule autophagy inducers identified compounds that could rescue the block in autophagy, leading to increased cell viability in NPC1-deficient hepatic and neuronal cells.

## RESULTS

### Generation and Characterization of NPC Patient-Specific iPSCs

We generated transgene-free iPSCs from fibroblasts of NPC patients (Table 1) using Cre-excisable lentiviruses (Figure S1A available online) (Soldner et al., 2009; Sommer and Mostoslavsky, 2010) and derived up to 15 independent

NPC1 iPSC lines from each patient sample (Table 1). We chose those with the lowest number of viral integrations for Cre-recombinase-mediated vector excision, which was confirmed by Southern blot analysis (Figures S1B and S1C). NPC1 iPSC lines expressed transcripts of endogenous pluripotency-related genes, stained positive for pluripotency markers, displayed a normal karyotype and were capable of forming teratomas with contribution to all three embryonic germ layers (Figures S1D–S1G). NPC1 protein levels were markedly reduced in NPC1 iPSC-derived cells compared to control cells (Figure S1H). To generate disease-affected cell types, we induced hepatic (Si-Tayeb et al., 2010) and neuronal differentiation (Marchetto et al., 2010). Hepatic-like cells showed characteristic morphology, stained positive for lineage-specific markers such as  $\alpha$ -fetoprotein (AFP), HNF4- $\alpha$  (HNF4a) and human albumin (ALB), and expressed lineage-specific genes (Figures 1A, S1I, and S1J). Neurons expressed specific markers such as class III  $\beta$ -tubulin (TUJ1) and microtubule-associated protein 2 (MAP2) (Figure 1B). Cell viability was significantly reduced in NPC1 iPSC-derived hepatic-like cells and aged neuronal cultures as compared to control iPSC and hESC-derived cells (Figures 1C and 1D).

### Generation of Isogenic Mutant and Control NPC1 iPSCs

Recent progress in human gene targeting using zinc finger nuclease and TALENs allows for the correction of a single disease-causing point mutation in iPSCs, and thereby the

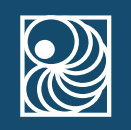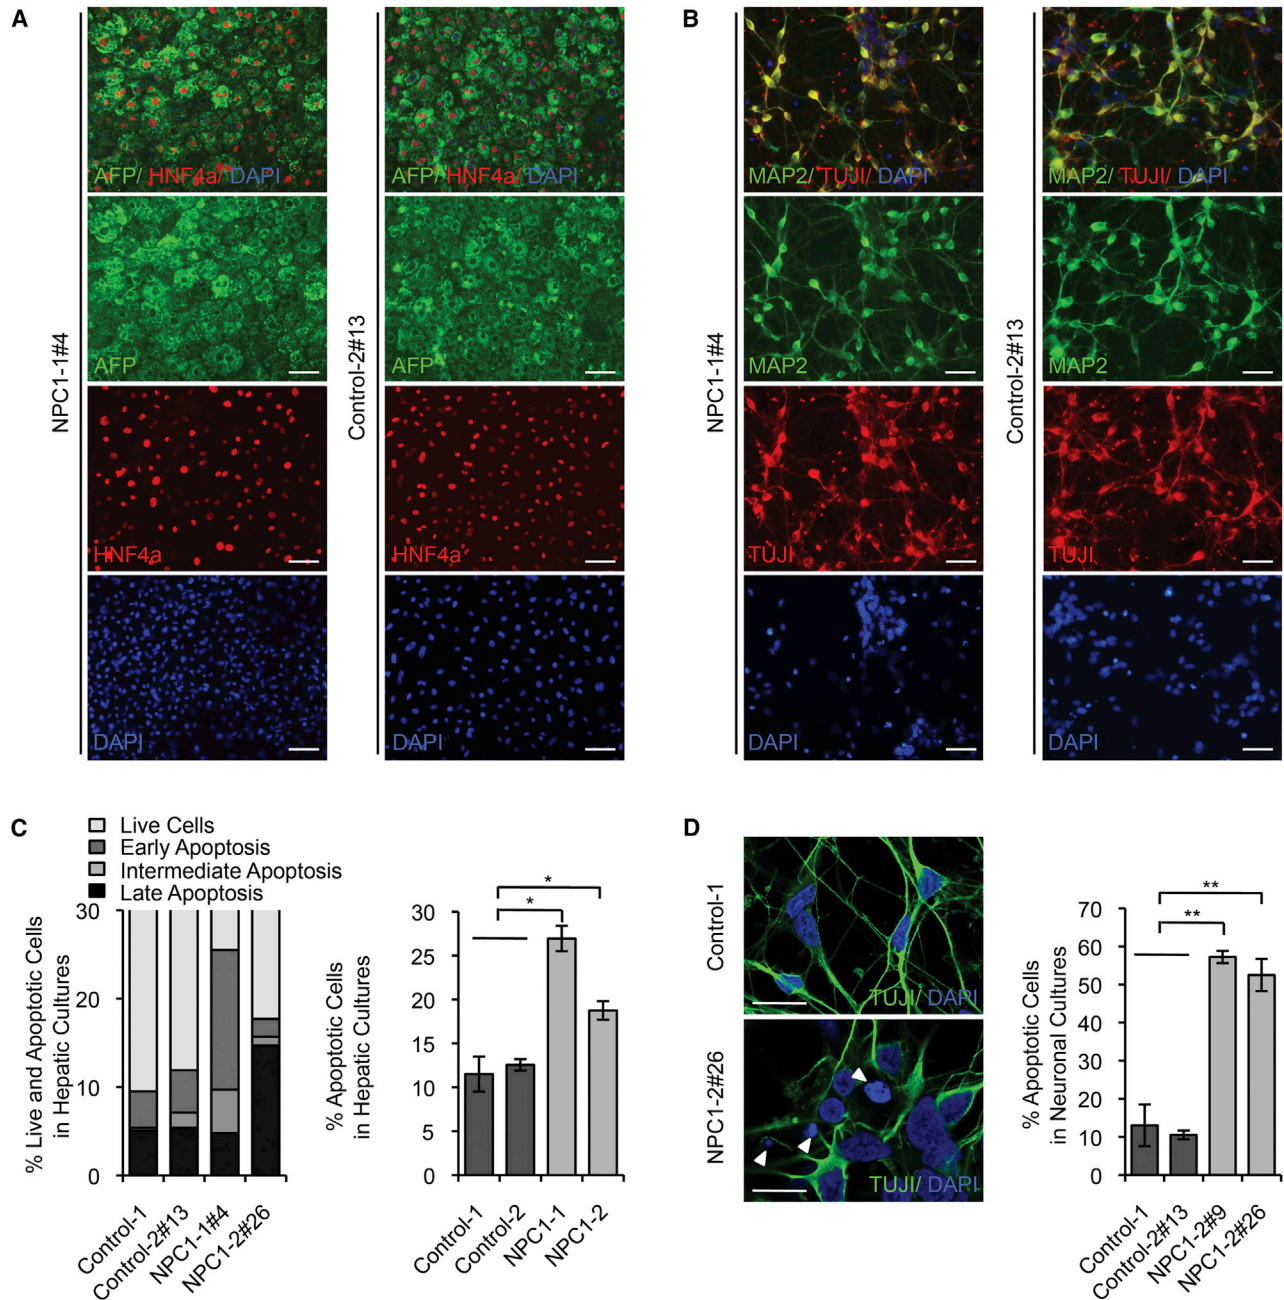

**Figure 1. Generation and Characterization of Patient-Specific NPC1 iPSCs**

(A) Immunofluorescence staining of hepatic cultures derived from representative NPC1 iPSC lines 21 days after induction of hepatocyte differentiation for Alpha-fetoprotein (AFP; green) and HNF4a (red). Nuclei were stained with DAPI (blue). Scale bar, 100  $\mu$ m.

(B) Immunofluorescence staining of neuronal cultures derived from representative NPC1 iPSC lines 14 days after induction of differentiation for neuron-specific microtubule-associated protein 2 (MAP2; green) and class III  $\beta$ -tubulin (TUJI; red). Nuclei were stained with DAPI (blue). Scale bar, 100  $\mu$ m.

(C) FACS analysis of cell viability and apoptosis in control and NPC1 iPSC-derived hepatic cultures measuring FITC-Annexin V and propidium iodide staining. Graphical data (right panel) represent mean  $\pm$  SE (n = 3).

(D) Analysis of cell death in control and NPC1 iPSC-derived 5-week-old TUJI positive neurons. Nuclei stained with DAPI. Arrow shows apoptotic nuclei. Scale bar, 10  $\mu$ m. Graphical data represent mean  $\pm$  SE (n = 3).

Results shown are representative of at least three independent experiments using two different clones of each line unless otherwise indicated. \*\*\*p < 0.001; \*\*p < 0.01; \*p < 0.05; ns, nonsignificant.

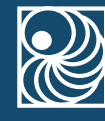

generation of isogenic disease and control cell lines (Soldner et al., 2011; Yusa et al., 2011). To repair the *NPC1*<sup>I1061T</sup> mutation, we designed TALEN pairs introducing a DNA double-strand break close to nt 3181C (Figures 2A, 2B, and S2A; see Supplemental Information) (Cermak et al., 2011). The donor construct contained a puromycin selection cassette (puroΔtk) flanked by piggyBac terminal repeats (Yusa et al., 2011) (Figure 2B) allowing for correction of the *I1061T* mutation and the complete removal of the selection cassette. We targeted a NPC patient line that is compound heterozygous and carries the *NPC1*<sup>I1061T</sup> mutation on one allele (NPC1-2) (Table 1). Integration of the piggyBac cassette was confirmed by Southern blot analysis and PCR (Figure S2B; data not shown). Out of 146 NPC1-2 iPSC-derived clones analyzed, five were targeted on the allele carrying the *I1061T* mutation (Table S1). In addition, we targeted the control line (control-2) that has one *NPC1* mutant and one wild-type allele (Table 1). Two clones had the selection cassette integrated on the wild-type allele (Table S1). Integration of the piggyBac cassette on the wild-type allele in this cell line disrupted exon 21 and thereby generated a second mutant allele (Control-2-Mut). Overall, we observed a targeting efficiency of 6%. Transient expression of transposase in the targeted clones led to removal of the piggyBac selection cassette, which was confirmed by Southern blot (Figure 2C). We did not detect any reintegration of the piggyBac element (Figure S2C). Correction of the *I1061T* mutation in the NPC1-2-Corr line and restoration of the wild-type allele in the Control-2-Corr line were further confirmed by sequence analysis and PCR (Figures 2D and S2D). Analysis of the genomic DNA of corrected clones at the top ten predicted off-target cutting loci of TALEN pair 1 revealed no mutations (see Supplemental Information; data not shown). Genome-wide comparison of copy number variations (CNVs) of independent NPC1 iPSC lines and the isogenic pairs using Illumina sequencing showed no major changes (Figures S2E and S2F). Corrected NPC1 iPSC lines expressed pluripotency markers, were capable of forming teratomas and efficiently differentiated into hepatic-like and neuronal cells (Figures 2E, S2G, and S2H). Loss and restoration of NPC1 protein levels in the targeted NPC1 iPSCs was confirmed by western blot analysis (Figure 2F).

### NPC1 iPSC-Derived Hepatic and Neuronal Cells Show Defects in Cholesterol Metabolism

NPC disease is considered to be primarily a neurodegenerative disorder; nevertheless, hepatomegaly is one of the first detectable disease manifestations in more than 50% of NPC patients, and a significant number of infants die from liver failure (Kulinski and Vance, 2007; Rosenbaum and Maxfield, 2011; Vanier, 2010), but NPC1 deficiency in human disease-affected cell types has not been

analyzed because of a lack of availability. We detected cholesterol accumulation in the LE/L compartments by Filipin staining in NPC1-deficient hepatic-like and neuronal cells (Figures 3A and 3B) similar to that observed in NPC1 iPSC-derived fibroblasts (Figures S3A and S3B). Sequestration of cholesterol in the LE/L compartments consequently affects downstream pathways, such as cholesterol ester (CE) synthesis (Abi-Mosleh et al., 2009; Brown and Goldstein, 1997; Goldstein et al., 1983), prompting us to analyze cholesterol esterification and the cholesterol sensing machinery in mutant hepatic cells. Defects in acetyl-CoA acetyltransferase-mediated synthesis of CE were detected by measuring the incorporation of [<sup>14</sup>C]oleate (Brown and Goldstein, 1997; Goldstein et al., 1983). Cholesteryl [<sup>14</sup>C]oleate synthesis was markedly increased in control hepatic-like cells after LDL treatment, whereas no increase was detected in NPC1-deficient hepatic-like cells (Figure 3C), suggesting an impairment in CE synthesis. Hydroxypropyl-β-cyclodextrin (HP-β-cyclodextrin), which releases cholesterol from the LE/L compartments (Abi-Mosleh et al., 2009), allowed CE synthesis in NPC1-deficient hepatic-like cells but not in the control cells (Figure 3D). HP-β-cyclodextrin (0.2%) was sufficient to induce maximal formation of cholesteryl [<sup>14</sup>C]oleate in NPC1-deficient hepatic-like cells. We did not detect any general effect on triglyceride formation in the treated hepatic cells (Figure S3C). NPC1-deficient and control cells treated with 25-hydroxycholesterol (25-HC), which stimulates cholesterol esterification by causing cholesterol to translocate directly from the plasma membrane to the ER, responded in a similar range (Figure S3D) (Abi-Mosleh et al., 2009), indicating that components of the cholesterol pathway downstream of LE/L compartments were intact. Our data show that sequestration of LE/L-resident cholesterol impairs cholesterol esterification in NPC1-deficient hepatic-like cells.

### Rescue of Cholesterol Defects by Treatment with HP-β-Cyclodextrin or by Genetic Correction of the *NPC1*<sup>I1061T</sup> Mutation

A block in cholesterol transport to the ER impairs transcriptional regulation caused by constant activation of proteolytic cleavage of the sterol regulatory element-binding proteins (SREBPs) (Horton et al., 2002). Because cleaved SREBP translocates to the nucleus and activates transcription, we analyzed the formation of nuclear SREBP-2 (nSREBP-2) in NPC1-deficient hepatic cells. Although in control cells nSREBP-2 was decreased in the nuclear fraction in response to treatment with 10% serum, we did not detect any changes in NPC1-deficient cells (Figure 3E). Similar observations were made in NPC1 iPSC-derived neurons after treatment with 2% serum (Figure 3F). In addition, increased nSREBP-2 levels in

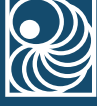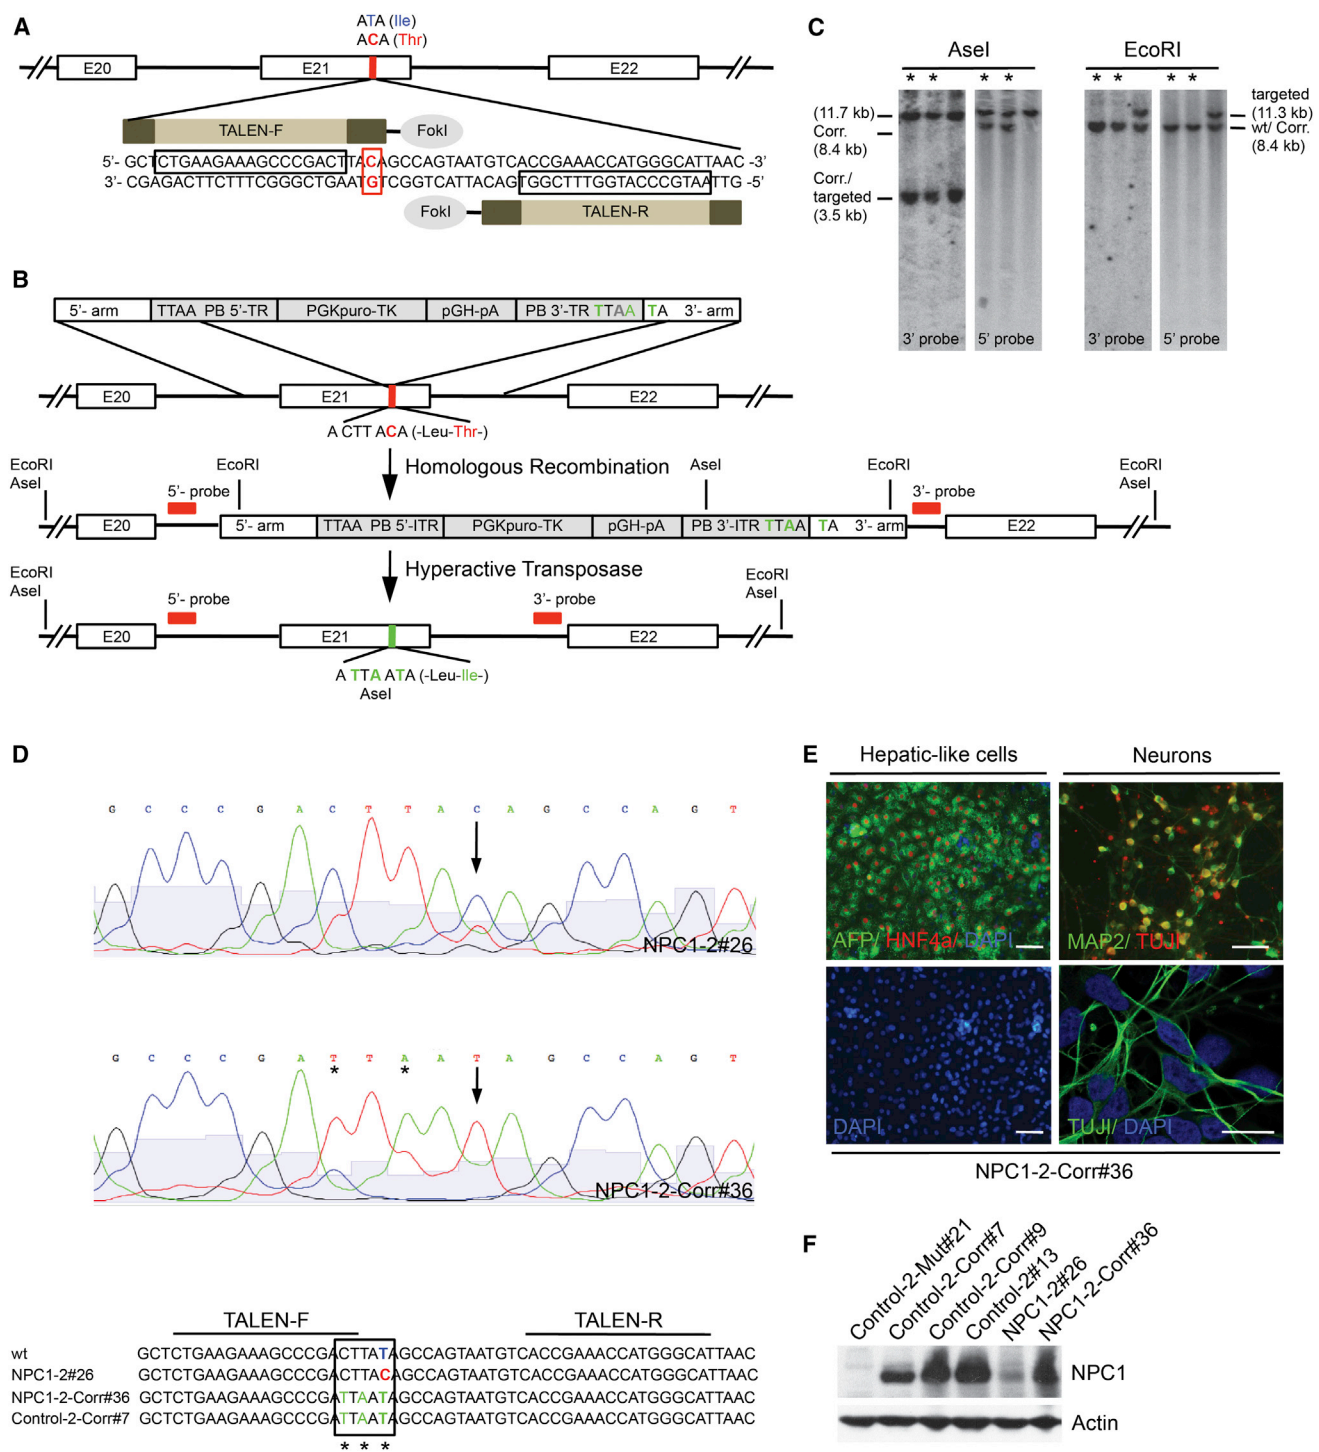

**Figure 2. Correction of NPC1<sup>I1061T</sup> Mutation in Patient-Specific iPSCs**  
 (A) Schematic overview of specific TALENs cutting site in the *NPC1* gene. Blue letters are indicating the wild-type base and amino acid, respectively; red indicates the mutation.  
 (B) Schematic overview depicting the *NPC1*<sup>I1061T</sup> targeting strategy showing piggyBac (PB) donor plasmid design with homologous 5'- and 3'-arms, PB terminal repeats (PB-TR), and selection cassette (PGK-puroTK, pGH-pA). Exons (white boxes), restriction sites, and location of external 5' and 3' Southern blot probes (red bars) are indicated. Enlarged sequence indicates *I1061T* mutation in exon 21 (red base). Introduced changes are labeled in green.

(legend continued on next page)

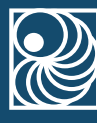

NPC1-deficient hepatic cells lead to upregulation of transcription of specific target genes, such as SREBPs themselves. We detected an increase in SREBP RNA levels in NPC1-deficient hepatic cells after treatment with 10% serum, whereas RNA levels in controls were downregulated (Figure S3E). Upon combined treatment with 10% serum and 0.2% HP- $\beta$ -cyclodextrin, transcript levels of SREBP and low-density lipoprotein receptor (LDL-R) decreased in NPC1-deficient hepatic cultures and were comparable to those in control cells after treatment with 10% serum only (Figures S3F and S3G). After correction of the *NPC1*<sup>I1061T</sup> mutation, NPC iPSC-derived hepatic and neuronal cells showed normal cholesterol distribution (Figures 3A and 3B) and responded to serum treatment by suppressing SREBP2 cleavage, as evident by a reduction in nSREBP2 protein and SREBP transcript levels (Figures 3E, 3F, and S3E). These results confirmed defects in cholesterol sensing in NPC1 iPSC-derived hepatic and neuronal cells that could be rescued by genetic correction of *NPC1*<sup>I1061T</sup>.

#### Impairment of Autophagic Flux in NPC1 iPSC-Derived Human Disease-Affected Cell Types

Emerging evidence indicates that impaired autophagy contributes to neurodegenerative and liver disorders (Hara et al., 2006; Komatsu, 2012; Mizushima et al., 2008; Ravikumar et al., 2010) and is thought to be involved in NPC1 disease (Elrick et al., 2012; Ordonez et al., 2012; Sarkar et al., 2013). We assessed perturbation in autophagic flux in NPC1-deficient hepatic and neuronal cells. To monitor autophagic flux in NPC patient-specific iPSC-derived cells, we measured the levels of the specific autophagosome maker LC3-II (light chain 3 of microtubule-associated protein 1) and the pathway-specific substrate, p62. Levels of LC3-II directly correlate with the steady-state number of autophagosomes, whereas the levels of p62 reflect autophagic turnover (Klionsky et al. 2012, Bjørkøy et al., 2009). Both LC3-II and p62 levels were significantly increased in NPC1-deficient hepatic-like cells compared to the control cells (Figure 4A), suggesting impaired autophagic flux. However, p62 transcript levels in control and NPC1-deficient hepatic cells were comparable (Figure S4A), implying that accumulation of p62 protein is due to reduced clearance rather

than diminished transcription. Similar observations were made in NPC1 iPSC-derived neuronal cultures (Figure 4B). We further analyzed autophagosome synthesis with a saturating concentration of bafilomycin A<sub>1</sub> (BafA<sub>1</sub>), which inhibits lysosomal acidification and prevents LC3-II degradation, thus causing its accumulation (Klionsky et al., 2012). After BafA<sub>1</sub> treatment, the accumulation of LC3-II in NPC1-deficient hepatic-like and neuronal cells was abrogated compared to controls (Figures 4C and 4D). These data suggest that accumulation of autophagosomes is not due to increased autophagosome synthesis but rather occurs because of a block in autophagic flux in NPC1-deficient cells. We did not find alterations in the upstream events regulating autophagosome synthesis, such as the levels of Beclin 1 and Atg5-Atg12 conjugation, in NPC1-deficient cells (Figures S4B and S4C). These data are consistent with our recent findings related to a block in autophagic flux seen in mouse NPC1 mutant cells that is attributed to impaired formation of amphisomes, resulting from defects in the SNARE machinery that regulates autophagosome maturation (Sarkar et al., 2013). Impaired SNARE functioning and autophagic flux are also reported in other lysosomal storage disorders, such as multiple sulphatase deficiency and mucopolysaccharidosis type IIIA, where LE/L-resident cholesterol accumulation is observed (Fraldi et al., 2010). We were not able to detect impaired autophagy in NPC1-deficient iPSCs, hepatic and neuronal progenitor cells, or early neurons (data not shown). Our data argue against previous findings that attributed the increase in steady-state LC3-II levels in human cells to an induction of autophagy (Ordonez et al., 2012; Pacheco et al., 2007).

#### Defect in Autophagy Is Directly Linked to the *NPC1*<sup>I1061T</sup> Mutation

To assess whether the defect in autophagic flux is caused by NPC1 deficiency, we compared LC3-II and p62 levels in hepatic and neuronal cells carrying the *NPC1*<sup>I1061T</sup> mutation and their isogenic control. We found that basal autophagy was restored in the mutant cells after genetic correction (Figures 4E and 4F). In contrast, disruption of the *NPC1* wild-type allele in control hepatic cells, which led to loss of NPC1 expression (Figure 2F), resulted in

(C) Southern blot analysis of NPC1 iPSCs after excision of PB selection cassette. Fragment sizes of wild-type (wt), corrected (Corr.), and targeted alleles are indicated. Excised clones are marked with an asterisk.

(D) Sequencing of genomic *NPC1* locus in indicated NPC1 iPSC lines. The corrected *I1061T* mutation is marked with an arrow, induced by changes with an asterisk.

(E) Immunofluorescence staining of hepatic [AFP (green) and HNF4a (red)] and neuronal cultures [MAP2 (green) and TUJ1 (red or green, respectively)] derived from representative NPC1-2-Corr#36 line. Nuclei were stained with DAPI (blue). Scale bar, 100  $\mu$ m and 10  $\mu$ m (lower right).

(F) Immunoblot analysis of indicated control and NPC1 iPSCs lines detecting NPC1 and actin protein levels.

Results shown in (C)–(F) are representative of at least three independent experiments using two different clones of each line.

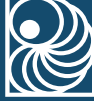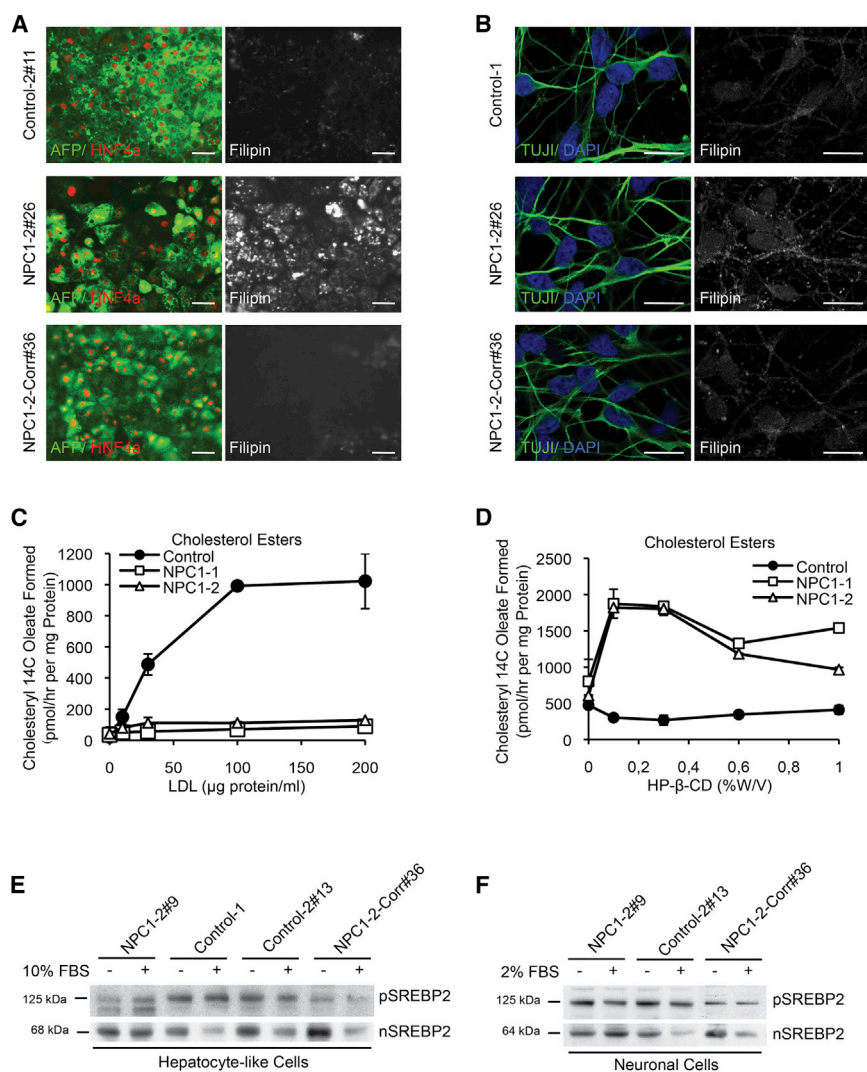

**Figure 3. Analysis of Cholesterol Metabolism in Isogenic NPC1 iPSC-Derived Cell Types**

(A and B) Immunofluorescence staining of representative control, mutant, and corrected NPC1 iPSC-derived hepatic (A) and neuronal (B) cells with lineage markers [AFP, green; HNF4a, red (A); TUJI, green (B)], respectively. Endogenous cholesterol was detected by Filipin staining (white) in the same samples as the lineage marker staining (A) or in duplicate samples of the same experiment (B). Scale bar, (A) 100 μm and (B) 10 μm. Results shown are representative of at least three independent experiments using two different clones of each line.

(C) Cholesterol ester formation in NPC1-deficient and control hepatic-like cultures after exposure to different concentrations of low-density lipoprotein (LDL). Mean variation for each of the duplicate incubations for control, NPC1-1, and NPC1-2 were in a range between 9% and 20% for the untreated samples and between 1%–31% for the data points at the different LDL concentrations, respectively.

(D) Cholesterol ester formation in NPC1 iPSC-derived hepatic cultures after exposure to different concentrations of HP-β-cyclodextrin (HP-β-CD [%w/v]). Mean variations for each of the duplicate incubations for control, NPC1-1, and NPC1-2 were in a range between 1% and 37% for the untreated samples and between 0.2% and 24% for the data points at the different HP-β-CD concentrations, respectively.

(C and D) Results shown are the mean of duplicates of each cell line and representative for three independent experiments using different clones of indicated cell lines.

(E and F) Immunoblot analysis detecting the activation of sterol regulatory element-binding protein 2 (SREBP2) cleavage in NPC1 iPSC-derived hepatic (E) and neuronal (F) cells after incubation with indicated serum concentrations. pSREBP2 (precursor SREBP2) in the cytoplasmic and nSREBP2 in the nuclear fraction of cell lysates were detected. Protein sizes are indicated. Results shown are representative of at least three independent experiments using two different clones of each line.

marked increase of LC3-II and p62 levels, which phenocopied the effects found in NPC1 iPSC-derived hepatic cells (Figure S4D). Electron microscopic analysis confirmed accumulation of autophagic vacuoles and lipid droplets (LDs) in NPC1 mutant hepatic cells, a phenotype that was abolished after correction of the *NPC1*<sup>H1061T</sup> mutation (Figures 4G and S4E). Thus, genetic correction of the *NPC1* mutation rescued both the cholesterol and autophagy abnormalities.

Treatment with HP-β-cyclodextrin (Vance and Peake, 2011) did not rescue the perturbation in autophagic flux.

Instead, we observed an increased block in autophagy, which was dose dependent as evident by elevation of LC3-II and p62 levels (Figure S5A). A lower dose of HP-β-cyclodextrin (0.2%), sufficient to restore defects in cholesterol metabolism as shown by induction of cholesterol esterification (Figure 3D), did not further impair autophagy in NPC1 iPSC-derived hepatic-like cells (Figure S5A). In summary, we show a block in autophagic flux in NPC1 disease-affected human cells. This defect was abrogated in hepatic-like and neuronal cells by genetic correction of the *NPC1*<sup>H1061T</sup> mutation but not by depleting cholesterol,



thus implying that impaired autophagy is directly linked to loss of NPC1 protein function.

### Induction of Autophagy Rescues the Defect in Basal Autophagy and Increases Cell Viability in NPC1-Deficient Hepatic-like and Neuronal Cells

Upregulation of autophagy is beneficial in transgenic models of several neurodegenerative and certain liver disorders (Rubinsztein et al., 2012; Sarkar, 2013). Using NPC iPSC-derived cells may allow the identification of potent compounds that can rescue the autophagy defects in human disease-affected cells. We found that induction of autophagy by inhibiting the mammalian target of rapamycin (mTOR) pathway with rapamycin (Rap) or starvation (Ravikumar et al., 2010) significantly reduced p62 levels in NPC1 iPSC-derived hepatic cells to amounts comparable to the basal levels in control cells (Figures 5A and S5B). Because long-term treatment with mTOR inhibitors may have unfavorable side effects due to critical functions of mTOR in growth and translation (Sarkar, 2013), we performed a small-scale candidate drug screen testing different concentrations of mTOR-independent autophagy enhancers, such as carbamazepine (CBZ), verapamil (Ver), trehalose (Tre), and SMER28 (Figures 5B and S5C; see Supplemental Information). These compounds are reported to be protective in *Drosophila* or mouse models of Alzheimer's, Parkinson's, and Huntington's disease (Rubinsztein et al., 2012; Sarkar, 2013) or  $\alpha$ -antitrypsin deficiency (Hidvegi et al., 2010; Sarkar, 2013). By measuring p62 clearance, we found CBZ to be the most potent drug in rescuing the defective autophagy phenotype in NPC1 iPSC-derived hepatic cells (Figure 5B). CBZ, which induces mTOR-independent autophagy by lowering inositol and IP<sub>3</sub> levels (Sarkar et al., 2005), reduced p62 levels to a similar extent as observed with rapamycin treatment (Figure 5B). Our data suggest that CBZ-mediated restoration of autophagic flux was sufficient to overcome the block observed in NPC1-deficient hepatic cells, which may be due to a recently characterized bypass mechanism (Sarkar et al., 2013).

We assessed the possibility of using CBZ in combination with HP- $\beta$ -cyclodextrin (0.2%, sufficient to induce cholesterol ester formation without perturbing autophagy; Figures 3D and S5A) to simultaneously restore both the cholesterol and autophagy defects. We found a significant reduction in p62 levels after dual treatment comparable to the effects of CBZ alone (Figure 5C), as well as a partial rescue of the defective cholesterol metabolism as observed by downregulation of SREBP protein, and SREBP and LDL-R transcript levels (Figures S5D and S5E). p62 transcript levels were not affected by the compound treatment (Figure S5F), suggesting that the clearance of p62 protein levels is due to increased autophagic degradation. Chemical induction of autophagy with Rap or CBZ, or CBZ in combination

with a low dose of HP- $\beta$ -cyclodextrin, significantly increased cell viability of NPC1-deficient hepatic cells (Figures 5D and 5E).

We further evaluated the effects of autophagy-inducing compounds using NPC1 iPSC-derived neuronal cultures. In addition to Rap and CBZ, Tre and Ver significantly rescued the defective autophagy phenotype in these cells, as assessed by p62 clearance (Figures 5F and S5G). Notably, cell viability in NPC1-deficient neuronal cultures was significantly increased with all the chemical inducers of autophagy alone, as well as in combination with 0.2% HP- $\beta$ -cyclodextrin (Figure 5G). Although our data suggest that induction of autophagy by itself is cytoprotective in the context of NPC disease, combining this treatment with a partial release of the LE/L-resident cholesterol can restore the autophagy defects as well as improve cholesterol homeostasis in the liver and the brain.

## DISCUSSION

In summary, our data show that patient-specific NPC1 iPSC-derived hepatic and neuronal cells are less viable and develop disease-relevant defects, such as in cholesterol metabolism and autophagic flux (Figure 6). In contrast to previous reports, we do not observe similar defects in NPC1 iPSCs or in neuronal and liver progenitor cells (Trilck et al., 2013). Both these defects are abrogated after correction of the NPC1<sup>H1061T</sup> mutation, implying that the NPC1 protein has a functional role in both the processes. Recent studies provide evidence that regulation of lipolysis and autophagy are interrelated and controlled by similar regulatory mechanisms (Singh and Cuervo, 2012). We speculate that disturbance of this interrelation may trap NPC1-deficient cells in a vicious cycle where inhibition of autophagy will cause increased intracellular lipid content (Ouimet, 2013; Sarkar et al., 2013; Singh and Cuervo, 2012; Singh et al., 2009), a condition that may further deteriorate by the release of high levels of cholesterol (Peake and Vance, 2012) or by blocking autophagy (Meske et al., 2014; Sarkar et al., 2013). Brain and liver-specific deletion of essential autophagy genes (such as *Atg5* or *Atg7*) in normal mice causes neurodegeneration and liver injury, respectively (Hara et al., 2006; Komatsu et al., 2006, 2007), similar to those observed in NPC1 patients. These observations further support our assumption that impairment in autophagy is a crucial contributing factor for NPC disease.

Our data argue that induction of autophagy might be a plausible treatment option for NPC disease. Such a strategy is supported by our recent study in NPC1 mutant mouse cells showing that a block in autophagic flux due to defects in amphisome formation can be bypassed by stimulating autophagy (Sarkar et al., 2013). Induction of



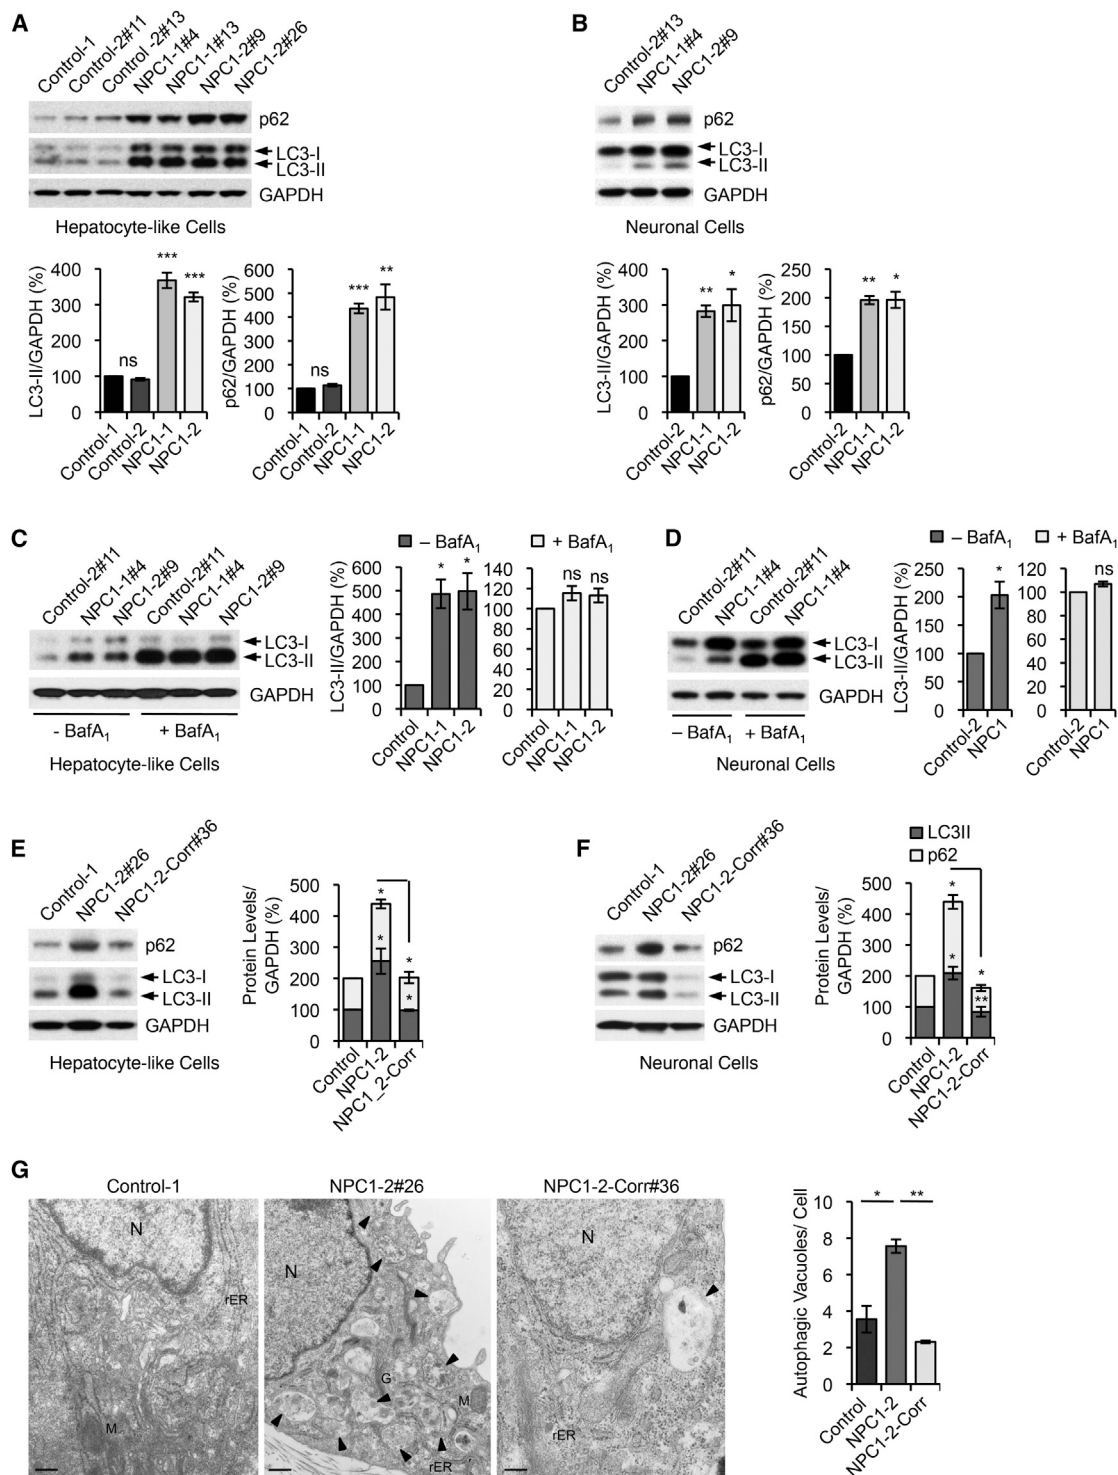

**Figure 4. Genetic Correction of Autophagy Phenotype in NPC1 iPSC-Derived cells**

(A and B) Immunoblot analysis and quantifications of p62 and LC3-II levels using anti-p62, anti-LC3, and anti-GAPDH antibodies in hepatic (A) and neuronal cultures (B) derived from indicated control and NPC1 iPSC lines. Graphical data represent mean  $\pm$  SE (n = 4). (C and D) Immunoblot analysis and quantification of LC3-II levels using anti-LC3 and anti-GAPDH antibodies in hepatic (C) and neuronal cultures (D) derived from control and NPC1 iPSC lines, treated with or without 400 nM bafilomycin A<sub>1</sub> (BafA<sub>1</sub>) for 4 hr. Graphical data represent mean  $\pm$  SE (n = 3).

(legend continued on next page)



autophagy has been shown to be protective in several models of neurodegenerative and liver diseases (Hidvegi et al., 2010; Ravikumar et al., 2010; Rubinsztein et al., 2012; Sarkar, 2013). Because mTOR governs critical cellular function such as translation and cell growth, small molecule autophagy enhancers acting independently of mTOR might be more suitable for long-term treatment of patients. Screening mTOR-independent autophagy inducers that are known to increase autophagic flux in various in vitro and in vivo transgenic disease models (Sarkar, 2013) revealed cell type specificity, because only CBZ could overcome the impairment in autophagy in both NPC1 iPSC-derived hepatic and neuronal cells. These findings underline the unique value of using human iPSC-derived disease-relevant cells for identifying potent compounds of biomedical relevance (Grskovic et al., 2011). We show that higher concentrations of HP- $\beta$ -cyclodextrin treatment further perturb autophagic flux in NPC1 iPSC-derived hepatic cells with likely deleterious cellular consequences. These observations are consistent with earlier findings describing neurotoxic effects of HP- $\beta$ -cyclodextrin treatment in neurons from NPC1 mutant mice (Peake and Vance, 2012).

Our data indicate that induction of autophagy itself is beneficial, and in combination with a cholesterol-depleting agent (such as low dose of HP- $\beta$ -cyclodextrin) that does not impact on autophagy will rescue both the autophagy and cholesterol defects in NPC1 patients. Our study suggests that inducing autophagy with CBZ may have overall benefit for the treatment of NPC disease as it might be effective in liver and brain.

## EXPERIMENTAL PROCEDURES

### HiPSC Derivation, Cultivation, and Differentiation

Transgene-free iPSCs were generated from fibroblasts of NPC patients (Table 1) using Cre-excisable lentiviruses encoding a polycistronic doxycycline-inducible (DOX) expression cassette containing all four reprogramming factors Oct4, Klf4, Sox2, c-Myc (OKSM) (pHAGE2-TetOminiCMV-hSTEMCCA-loxP) (Sommer and Mostoslavsky, 2010) and a modified tetracycline-controlled trans-activator (FUW-M2rtTA-loxP) (Soldner et al., 2009). All pluripotent cell lines have been characterized using standard pluripotency assays (see Supplemental Experimental Procedures). All protocols were approved by the relevant Institutional Review Board (Massachusetts Institute of Technology) and the Embryonic

Stem Cell Research Oversight Committees (Whitehead Institute). Differentiation of iPSCs into hepatic-like cells was induced after single-cell replating of iPSCs on matrigel following published protocols (Si-Tayeb et al., 2010). Neuronal progenitors (NPs) and neurons were derived using an embryoid body (EB)-based protocol (Marchetto et al., 2010).

### TALEN and Donor Design and Generation

TALENs were designed according to previously published principles (Cermak et al., 2011; Miller et al., 2011). All TALENs used the +63 truncation point for fusion to the obligate heterodimeric FokI cleavage domain (Doyon et al., 2011; Miller et al., 2011). The tandem arrays of TALE repeats were assembled as described previously (Marchetto et al., 2010) (see Supplemental Information). Their editing activity was assayed using the Surveyor nuclease (Transgenomic) (Guschin et al., 2010). The targeted loci were PCR amplified using the following primer pairs: Cel-I-NPC1-F (5'-atgctgcctatgtctgcag-3') and Cel-I-NPC1-R (5'-tcacaga gacttagatcttg-3') for the *NPC1* locus. PCR products were then denatured, rehybridized, digested with the Surveyor nuclease, and analyzed. *NPC1*<sup>I1061T</sup>-specific TALENs pairs introducing a DNA double-strand break in exon 21 (nt 3181C) were designed according to previously published principles (Cermak et al., 2011). To increase targeting efficiency, we used a donor construct containing a puromycin selection cassette (PGK-puro $\Delta$ tk-pGH-pA cassette) flanked by piggyBac terminal repeats (Yusa et al., 2011). The 700 bp 3' homology arm introduced the ACA (Thr) to ATA (Ile) switch correcting for the mutation. In addition, a silent CTT to TTA (Leu) codon switch 3 bp upstream of the mutation was introduced, generating the TTAA sequence necessary for the piggyBac excision (Figures 2A and 2B).

### TALEN-Mediated Gene Targeting and Transposon Excision

Cells were prepared as described previously (Kondo et al., 2013; Soldner et al., 2009). Cells ( $1 \times 10^7$ ) were electroporated with 35  $\mu$ g of donor plasmid (designed and assembled by H.W.) and 7.5  $\mu$ g of each TALEN expression vector (Gene Pulser Xcell System, Bio-Rad: 250 V, 500  $\mu$ F, 0.4 cm cuvettes) and subsequently plated on DR4 MEF feeder layers in hESC medium supplemented with ROCK inhibitor for the first 24 hr. Puromycin selection (0.5  $\mu$ g/ml) was started 72 hr after electroporation. Individual colonies were picked 10–14 days after electroporation. Correctly targeted clones were confirmed by Southern blot (AseI, EcoRI digested) and used for transposon removal. Cells ( $1 \times 10^7$ ) were electroporated with 10  $\mu$ g of hyperactive *piggyBac* transposase expression vector (pCMV-hypBase) as described previously (Soldner et al., 2009). On day 4, medium was changed to hESC medium containing 0.25  $\mu$ M FIAU. Individual colonies were

(E and F) Immunoblot analysis and quantifications of p62 and LC3-II levels in hepatic (E) and neuronal cultures (F) derived from the NPC1-2 iPSC line after correction of the *NPC1*<sup>I1061T</sup> mutation. Graphical data represent mean  $\pm$  SE ( $n = 3$ ).

(G) Electron microscopy images of representative NPC1 iPSC-derived hepatic-like cells before and after genome editing. Arrows are indicating autophagic vacuoles. Graphical data represent mean  $\pm$  SE ( $n = 3$ ). Nucleus (N), rough endoplasmic reticulum (rER), mitochondria (M), Golgi (G). Scale bar, 500 nm.

Results shown are representative for at least three independent experiments using two different clones of each line. \*\*\* $p < 0.001$ ; \*\* $p < 0.01$ ; \* $p < 0.05$ ; ns, nonsignificant.

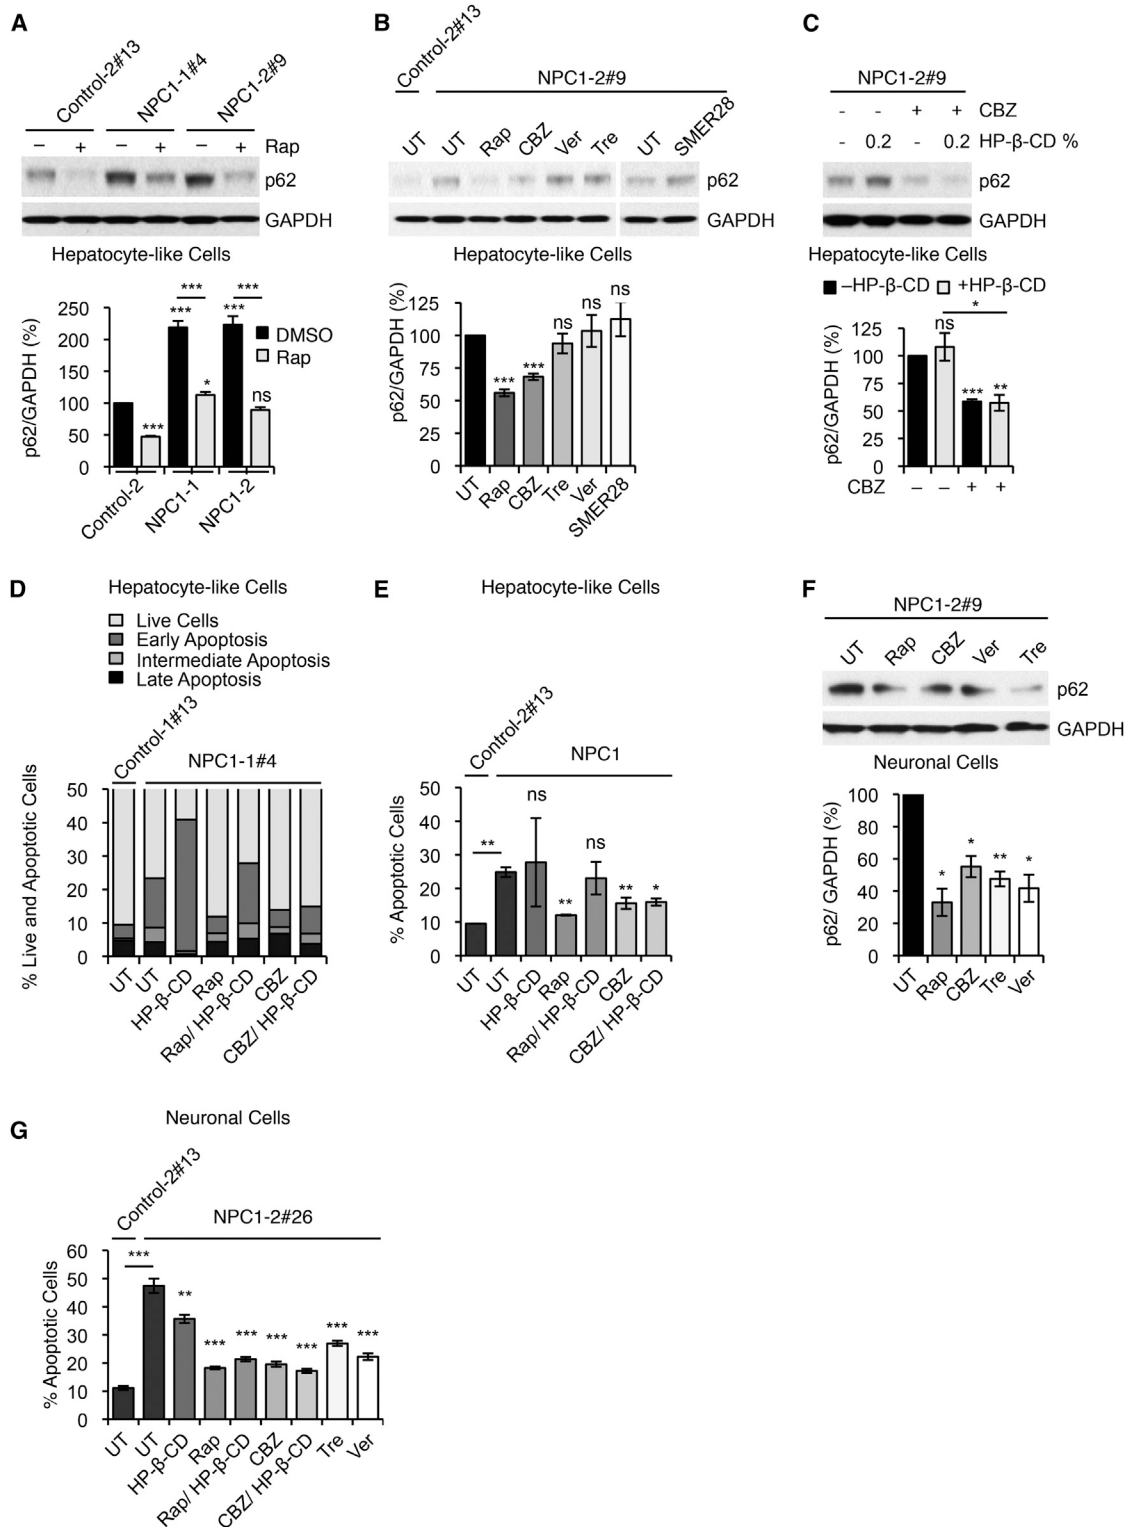

**Figure 5. Chemical Correction of Autophagy Phenotype in NPC1 iPSC-Derived cells**

(A) Immunoblot analysis and quantification of p62 levels using anti-p62 and anti-GAPDH antibodies in control and NPC1 iPSC-derived hepatic cultures, treated with either DMSO (vehicle control) or rapamycin (Rap). Graphical data represent mean ± SE (n = 3).

(legend continued on next page)

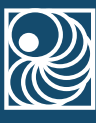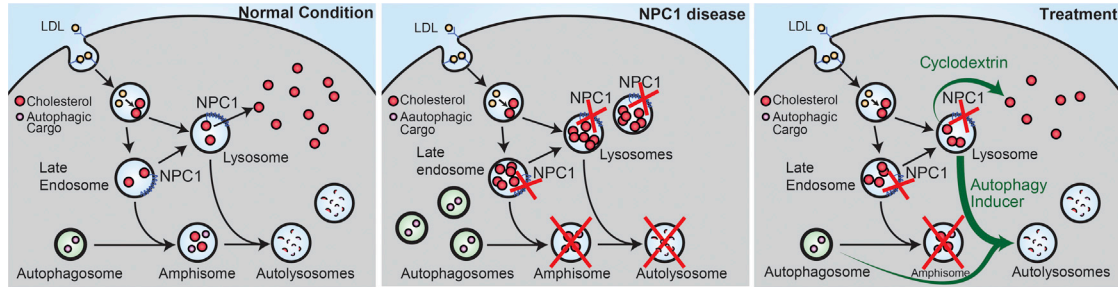

**Figure 6. Schematic Overview of Correction of Functional Defects in NPC Disease-Affected Cell Types**

Left panel shows cholesterol distribution and autophagic flux under normal conditions. Middle panel shows the effects due to loss of NPC1 protein function on cholesterol metabolism and autophagic flux. Mutations in the *NPC1* gene on both alleles lead to accumulation of cholesterol in the LE/L compartments by inhibiting its efflux, and to a block in autophagic flux causing accumulation of autophagosomes and autophagy substrate arising due to impaired formation of amphisomes. Chemical correction of disease related phenotypes are achieved by HP- $\beta$ -cyclodextrin-mediated cholesterol release and CBZ-mediated autophagy induction (green arrows, right panel). Restoration of autophagic flux by autophagy inducer is possibly through a bypass mechanism.

picked and expanded. Genotype and deletion of the piggyBac transposon were analyzed by Southern blot (AseI, EcoRI digest). Additionally PCR and sequencing mutation analysis was performed. Genomic DNA was amplified with primers NPC1-Wt-F (5'-cctttgattatacatgaaccag-3'), NPC1-I1061T-Mut-F (5'-gaagaaagc cggacttac-3'), NPC1-I1061T-Corr-F (5'-gaagaaagcccgattaat-3'), respectively, and NPC1-R (5'-gagcattccacagcattctg-3') under standard PCR conditions. PCR products were sequenced (Applied Biosystems Model 3730 capillary DNA sequencer with Big Dye Terminator Cycle Sequencing Kit).

#### Prediction of NPC1 TALENs Off-Target Sites

The position weight matrices (PWMs) of NPC1 TALEN pairs (see [Supplemental Information](#)) were constructed using model 3 as described previously ([Moscou and Bogdanove, 2009](#)) (see [Supplemental Information](#)).

#### Immunostaining

Immunostaining was performed according to standard protocols using primary antibodies listed in the [Supplemental Information](#). Cholesterol was detected by Filipin staining (50  $\mu$ g/ml Filipin complex, *Streptomyces filipinensis*; Sigma-Aldrich).

#### Acyl-CoA Acetyltransferase Assay

Defects in cholesterol metabolism were assessed using the Acyl-CoA Acetyltransferase Assay. The rate of incorporation of [ $^{14}$ C]oleate into cholesterol [ $^{14}$ C]oleate and [ $^{14}$ C]triglycerides by intact cell monolayers was measured as previously described ([Goldstein et al., 1983](#)).

#### Immunoblot Analysis

Cell pellets were lysed on ice in Lysis Buffer (10 mM Tris-HCl [pH 7.4], 2% SDS, 1 mM DTT, 10% glycerol, and 120 mg/ml urea) for 30 min in presence of Complete EDTA-free Protease Inhibitor Cocktail (Roche Diagnostics) and subjected to SDS-PAGE and standard immunoblot analysis. Primary antibodies used are listed in the [Supplemental Information](#). Amersham ECL Western Blotting Detection Reagent (GE Healthcare) was used for visualization.

#### Chemical Compounds

Autophagic flux in NPC1 iPSC-derived cells was assessed using a saturating concentration of bafilomycin A<sub>1</sub> (BafA<sub>1</sub>) clamping LC3-II/autophagosome degradation ([Klionsky et al., 2012](#)). To test the possibility of inducing autophagy, we performed a

(B) Immunoblot analysis and quantification of p62 levels using anti-p62 and anti-GAPDH antibodies in control and NPC1 iPSC-derived hepatic cultures after treatment with autophagy inducing compounds: untreated (UT), rapamycin (Rap), carbamazepine (CBZ), verapamil (Ver), trehalose (Tre), and SMER28. Graphical data represent mean  $\pm$  SE (n = 3).

(C) Immunoblot analysis and quantification of p62 levels using anti-p62 and anti-GAPDH antibodies in NPC1 iPSC-derived hepatic cultures, treated with CBZ and HP- $\beta$ -CD as indicated. Graphical data represent mean  $\pm$  SE (n = 3).

(D and E) FACS analysis of cell viability and apoptosis in NPC1 iPSC-derived hepatic cultures after treatment with indicated compounds measuring FITC-Annexin V and propidium iodide staining. (E) Graphical data represent mean  $\pm$  SE (n = 3).

(F) Immunoblot analysis and quantification of p62 levels using anti-p62 and anti-GAPDH antibodies in NPC1 iPSC-derived neuronal cultures after treatment with autophagy inducing compounds: untreated (UT), Rap, CBZ, Ver, and Tre. Graphical data represent mean  $\pm$  SE (n = 3).

(G) Analysis of cell death in NPC1 iPSC-derived 5-week-old neurons by assessing fragmented and TUNNEL positive nuclei. Graphical data represent mean  $\pm$  SE (n = 6).

Results shown are representative for at least two independent experiments using two different clones of each line. \*\*\*p < 0.001; \*\*p < 0.01; \*p < 0.05; ns, nonsignificant.

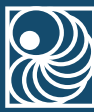

candidate drug screen including described mTOR-independent autophagy inducers (Sarkar, 2013) (Figure S5G; Supplemental Information). Their effect was analyzed by measuring p62 levels and cell viability by FITC-Annexin V/ PI staining. Compounds used for treatment of hepatic-like cells were bafilomycin A1 (Enzo Life Sciences), rapamycin (LC Laboratories), carbamazepine, verapamil, trehalose, SMER28, and HP- $\beta$ -cyclodextrin (all Sigma-Aldrich). Cells were treated with compounds as indicated.

### Statistical Analyses

Densitometry analyses on the immunoblots were done by ImageJ software (NIH) by measuring levels of the protein of interest relative to the loading control, as previously described (Williams et al., 2008). The control condition was set to 100%, and the data were represented as mean  $\pm$  SEM. The y axis values are shown in percentages (%). Experiments were performed in triplicates at least twice. The p values for densitometry analyses, vesicle number, and aggregate formation were determined by Student's t test (unpaired) using Prism 6 software (GraphPad), as previously described (Korolchuk et al., 2009). \*\*\*p < 0.001; \*\*p < 0.01; \*p < 0.05; ns, nonsignificant.

### ACCESSION NUMBERS

The NCBI SRA accession number for the CMV analysis reported in this paper is SRP026624.

### SUPPLEMENTAL INFORMATION

Supplemental Information includes Supplemental Experimental Procedures, five figures, and one table and can be found with this article online at <http://dx.doi.org/10.1016/j.stemcr.2014.03.014>.

### AUTHOR CONTRIBUTIONS

D.M., S.S., H.W., and R.J. designed the experiments and wrote the paper. D.M. and H.W. designed and performed the TALEN-mediated gene correction experiments. D.M. and S.S. designed and performed the autophagy experiments. L.A.-M. performed the ACAT assay. M.M. and P.X. provided technical assistance. A.W.C. performed computational analysis for TALEN specificity and for TALEN off-target cutting sites. Q.G. analyzed teratomas. All other experiments were performed by D.M.

### ACKNOWLEDGMENTS

We thank J.L. Goldstein, M.S. Brown, and D.F. Voytas for their helpful advice; R. Alagappan, T. Lungjangwa, K. Ganz, R. Flannery, D. Fu, T. DiCesare, T. Volkert, N. Watson, and W. Salmon for technical assistance. We thank Keck Microscopy Facility; Whitehead Technology Core; G. Bell of Whitehead Bioinformatics & Research Computing. We thank all Jaenisch lab members for helpful discussion. D.M. was a Peter G. Pentchev Research Fellow of the NNP Foundation. S.S. is a Former Fellow at Hughes Hall, University of Cambridge, UK. R.J. was supported by US NIH grant R01-CA084198 and Skoltech Center; J.L. Goldstein and M.S. Brown were supported by the US NIH grant HL20948. R.J. is an advisor to Stemgent and Fate Therapeutics.

Received: January 3, 2014

Revised: March 25, 2014

Accepted: March 31, 2014

Published: May 15, 2014

### REFERENCES

- Abi-Mosleh, L., Infante, R.E., Radhakrishnan, A., Goldstein, J.L., and Brown, M.S. (2009). Cyclodextrin overcomes deficient lysosome-to-endoplasmic reticulum transport of cholesterol in Niemann-Pick type C cells. *Proc. Natl. Acad. Sci. USA* 106, 19316–19321.
- Bjørkøy, G., Lamark, T., Pankiv, S., Øvervatn, A., Brech, A., and Johansen, T. (2009). Monitoring autophagic degradation of p62/SQSTM1. *Methods Enzymol.* 452, 181–197.
- Brown, M.S., and Goldstein, J.L. (1997). The SREBP pathway: regulation of cholesterol metabolism by proteolysis of a membrane-bound transcription factor. *Cell* 89, 331–340.
- Carstea, E.D., Morris, J.A., Coleman, K.G., Loftus, S.K., Zhang, D., Cummings, C., Gu, J., Rosenfeld, M.A., Pavan, W.J., Krizman, D.B., et al. (1997). Niemann-Pick C1 disease gene: homology to mediators of cholesterol homeostasis. *Science* 277, 228–231.
- Cermak, T., Doyle, E.L., Christian, M., Wang, L., Zhang, Y., Schmidt, C., Baller, J.A., Somia, N.V., Bogdanove, A.J., and Voytas, D.F. (2011). Efficient design and assembly of custom TALEN and other TAL effector-based constructs for DNA targeting. *Nucleic Acids Res.* 39, e82.
- Doyon, Y., Vo, T.D., Mendel, M.C., Greenberg, S.G., Wang, J., Xia, D.F., Miller, J.C., Urnov, F.D., Gregory, P.D., and Holmes, M.C. (2011). Enhancing zinc-finger-nuclease activity with improved obligate heterodimeric architectures. *Nat. Methods* 8, 74–79.
- Elrick, M.J., Yu, T., Chung, C., and Lieberman, A.P. (2012). Impaired proteolysis underlies autophagic dysfunction in Niemann-Pick type C disease. *Hum. Mol. Genet.* 21, 4876–4887.
- Fraldi, A., Annunziata, F., Lombardi, A., Kaiser, H.J., Medina, D.L., Spampanato, C., Fedele, A.O., Polishchuk, R., Sorrentino, N.C., Simons, K., and Ballabio, A. (2010). Lysosomal fusion and SNARE function are impaired by cholesterol accumulation in lysosomal storage disorders. *EMBO J.* 29, 3607–3620.
- Gelsthorpe, M.E., Baumann, N., Millard, E., Gale, S.E., Langmade, S.J., Schaffer, J.E., and Ory, D.S. (2008). Niemann-Pick type C1 I1061T mutant encodes a functional protein that is selected for endoplasmic reticulum-associated degradation due to protein misfolding. *J. Biol. Chem.* 283, 8229–8236.
- Goldstein, J.L., Basu, S.K., and Brown, M.S. (1983). Receptor-mediated endocytosis of low-density lipoprotein in cultured cells. *Methods Enzymol.* 98, 241–260.
- Grskovic, M., Javaherian, A., Strulovici, B., and Daley, G.Q. (2011). Induced pluripotent stem cells—opportunities for disease modeling and drug discovery. *Nat. Rev. Drug Discov.* 10, 915–929.
- Guschin, D.Y., Waite, A.J., Katibah, G.E., Miller, J.C., Holmes, M.C., and Rebar, E.J. (2010). A rapid and general assay for monitoring endogenous gene modification. *Methods Mol. Biol.* 649, 247–256.
- Hara, T., Nakamura, K., Matsui, M., Yamamoto, A., Nakahara, Y., Suzuki-Migishima, R., Yokoyama, M., Mishima, K., Saito, I.,



- Okano, H., and Mizushima, N. (2006). Suppression of basal autophagy in neural cells causes neurodegenerative disease in mice. *Nature* *441*, 885–889.
- Hidvegi, T., Ewing, M., Hale, P., Dippold, C., Beckett, C., Kemp, C., Maurice, N., Mukherjee, A., Goldbach, C., Watkins, S., et al. (2010). An autophagy-enhancing drug promotes degradation of mutant alpha1-antitrypsin Z and reduces hepatic fibrosis. *Science* *329*, 229–232.
- Horton, J.D., Goldstein, J.L., and Brown, M.S. (2002). SREBPs: activators of the complete program of cholesterol and fatty acid synthesis in the liver. *J. Clin. Invest.* *109*, 1125–1131.
- Klionsky, D.J., Abdalla, F.C., Abeliovich, H., Abraham, R.T., Acevedo-Arozena, A., Adeli, K., Agholme, L., Agnello, M., Agostinis, P., Aguirre-Ghiso, J.A., et al. (2012). Guidelines for the use and interpretation of assays for monitoring autophagy. *Autophagy* *8*, 445–544.
- Komatsu, M. (2012). Liver autophagy: physiology and pathology. *J. Biochem.* *152*, 5–15.
- Komatsu, M., Waguri, S., Chiba, T., Murata, S., Iwata, J., Tanida, I., Ueno, T., Koike, M., Uchiyama, Y., Kominami, E., and Tanaka, K. (2006). Loss of autophagy in the central nervous system causes neurodegeneration in mice. *Nature* *441*, 880–884.
- Komatsu, M., Waguri, S., Koike, M., Sou, Y.S., Ueno, T., Hara, T., Mizushima, N., Iwata, J., Ezaki, J., Murata, S., et al. (2007). Homeostatic levels of p62 control cytoplasmic inclusion body formation in autophagy-deficient mice. *Cell* *131*, 1149–1163.
- Kondo, T., Asai, M., Tsukita, K., Kutoku, Y., Ohsawa, Y., Sunada, Y., Imamura, K., Egawa, N., Yahata, N., Okita, K., et al. (2013). Modeling Alzheimer's disease with iPSCs reveals stress phenotypes associated with intracellular A $\beta$  and differential drug responsiveness. *Cell Stem Cell* *12*, 487–496.
- Korolchuk, V.I., Mansilla, A., Menzies, F.M., and Rubinsztein, D.C. (2009). Autophagy inhibition compromises degradation of ubiquitin-proteasome pathway substrates. *Mol. Cell* *33*, 517–527.
- Kulinski, A., and Vance, J.E. (2007). Lipid homeostasis and lipoprotein secretion in Niemann-Pick C1-deficient hepatocytes. *J. Biol. Chem.* *282*, 1627–1637.
- Marchetto, M.C., Carromeu, C., Acab, A., Yu, D., Yeo, G.W., Mu, Y., Chen, G., Gage, F.H., and Muotri, A.R. (2010). A model for neural development and treatment of Rett syndrome using human induced pluripotent stem cells. *Cell* *143*, 527–539.
- Meske, V., Erz, J., Priesnitz, T., and Ohm, T.G. (2014). The autophagic defect in Niemann-Pick disease type C neurons differs from somatic cells and reduces neuronal viability. *Neurobiol. Dis.* *64*, 88–97.
- Millard, E.E., Gale, S.E., Dudley, N., Zhang, J., Schaffer, J.E., and Ory, D.S. (2005). The sterol-sensing domain of the Niemann-Pick C1 (NPC1) protein regulates trafficking of low density lipoprotein cholesterol. *J. Biol. Chem.* *280*, 28581–28590.
- Miller, J.C., Tan, S., Qiao, G., Barlow, K.A., Wang, J., Xia, D.F., Meng, X., Paschon, D.E., Leung, E., Hinkley, S.J., et al. (2011). A TALE nuclease architecture for efficient genome editing. *Nat. Biotechnol.* *29*, 143–148.
- Mizushima, N., Levine, B., Cuervo, A.M., and Klionsky, D.J. (2008). Autophagy fights disease through cellular self-digestion. *Nature* *451*, 1069–1075.
- Moscou, M.J., and Bogdanove, A.J. (2009). A simple cipher governs DNA recognition by TAL effectors. *Science* *326*, 1501.
- Ordóñez, M.P., Roberts, E.A., Kidwell, C.U., Yuan, S.H., Plaisted, W.C., and Goldstein, L.S. (2012). Disruption and therapeutic rescue of autophagy in a human neuronal model of Niemann Pick type C1. *Hum. Mol. Genet.* *21*, 2651–2662.
- Ouimet, M. (2013). Autophagy in obesity and atherosclerosis: Interrelationships between cholesterol homeostasis, lipoprotein metabolism and autophagy in macrophages and other systems. *Biochim. Biophys. Acta* *1831*, 1124–1133.
- Pacheco, C.D., Kunkel, R., and Lieberman, A.P. (2007). Autophagy in Niemann-Pick C disease is dependent upon Beclin-1 and responsive to lipid trafficking defects. *Hum. Mol. Genet.* *16*, 1495–1503.
- Peake, K.B., and Vance, J.E. (2012). Normalization of cholesterol homeostasis by 2-hydroxypropyl- $\beta$ -cyclodextrin in neurons and glia from Niemann-Pick C1 (NPC1)-deficient mice. *J. Biol. Chem.* *287*, 9290–9298.
- Ravikumar, B., Sarkar, S., Davies, J.E., Futter, M., Garcia-Arencibia, M., Green-Thompson, Z.W., Jimenez-Sanchez, M., Korolchuk, V.I., Lichtenberg, M., Luo, S., et al. (2010). Regulation of mammalian autophagy in physiology and pathophysiology. *Physiol. Rev.* *90*, 1383–1435.
- Rosenbaum, A.I., and Maxfield, F.R. (2011). Niemann-Pick type C disease: molecular mechanisms and potential therapeutic approaches. *J. Neurochem.* *116*, 789–795.
- Rubinsztein, D.C., Codogno, P., and Levine, B. (2012). Autophagy modulation as a potential therapeutic target for diverse diseases. *Nat. Rev. Drug Discov.* *11*, 709–730.
- Saha, K., and Jaenisch, R. (2009). Technical challenges in using human induced pluripotent stem cells to model disease. *Cell Stem Cell* *5*, 584–595.
- Sarkar, S. (2013). Regulation of autophagy by mTOR-dependent and mTOR-independent pathways: autophagy dysfunction in neurodegenerative diseases and therapeutic application of autophagy enhancers. *Biochem. Soc. Trans.* *41*, 1103–1130.
- Sarkar, S., Floto, R.A., Berger, Z., Imarisio, S., Cordenier, A., Pasco, M., Cook, L.J., and Rubinsztein, D.C. (2005). Lithium induces autophagy by inhibiting inositol monophosphatase. *J. Cell Biol.* *170*, 1101–1111.
- Sarkar, S., Carroll, B., Buganim, Y., Maetzel, D., Ng, A.H., Cassady, J.P., Cohen, M.A., Chakraborty, S., Wang, H., Spooner, E., et al. (2013). Impaired autophagy in the lipid-storage disorder Niemann-Pick type C1 disease. *Cell Rep.* *5*, 1302–1315.
- Si-Tayeb, K., Noto, F.K., Nagaoka, M., Li, J., Battle, M.A., Duris, C., North, P.E., Dalton, S., and Duncan, S.A. (2010). Highly efficient generation of human hepatocyte-like cells from induced pluripotent stem cells. *Hepatology* *51*, 297–305.
- Singh, R., and Cuervo, A.M. (2012). Lipophagy: connecting autophagy and lipid metabolism. *Int. J. Cell Biol.* *2012*, 282041.
- Singh, R., Kaushik, S., Wang, Y., Xiang, Y., Novak, I., Komatsu, M., Tanaka, K., Cuervo, A.M., and Czaja, M.J. (2009). Autophagy regulates lipid metabolism. *Nature* *458*, 1131–1135.



- Soldner, F., and Jaenisch, R. (2012). Medicine. iPSC disease modeling. *Science* 338, 1155–1156.
- Soldner, F., Hockemeyer, D., Beard, C., Gao, Q., Bell, G.W., Cook, E.G., Hargus, G., Blak, A., Cooper, O., Mitalipova, M., et al. (2009). Parkinson's disease patient-derived induced pluripotent stem cells free of viral reprogramming factors. *Cell* 136, 964–977.
- Soldner, F., Laganière, J., Cheng, A.W., Hockemeyer, D., Gao, Q., Alagappan, R., Khurana, V., Golbe, L.I., Myers, R.H., Lindquist, S., et al. (2011). Generation of isogenic pluripotent stem cells differing exclusively at two early onset Parkinson point mutations. *Cell* 146, 318–331.
- Sommer, C.A., and Mostoslavsky, G. (2010). Experimental approaches for the generation of induced pluripotent stem cells. *Stem Cell Res. Ther.* 1, 26.
- Trilck, M., Hübner, R., Seibler, P., Klein, C., Rolfs, A., and Frech, M.J. (2013). Niemann-Pick type C1 patient-specific induced pluripotent stem cells display disease specific hallmarks. *Orphanet J. Rare Dis.* 8, 144.
- Vance, J.E., and Peake, K.B. (2011). Function of the Niemann-Pick type C proteins and their bypass by cyclodextrin. *Curr. Opin. Lipidol.* 22, 204–209.
- Vanier, M.T. (2010). Niemann-Pick disease type C. *Orphanet J. Rare Dis.* 5, 16.
- Williams, A., Sarkar, S., Cuddon, P., Ttofi, E.K., Saiki, S., Siddiqi, F.H., Jahreiss, L., Fleming, A., Pask, D., Goldsmith, P., et al. (2008). Novel targets for Huntington's disease in an mTOR-independent autophagy pathway. *Nat. Chem. Biol.* 4, 295–305.
- Xie, C., Turley, S.D., Pentchev, P.G., and Dietschy, J.M. (1999). Cholesterol balance and metabolism in mice with loss of function of Niemann-Pick C protein. *Am. J. Physiol.* 276, E336–E344.
- Yusa, K., Rashid, S.T., Strick-Marchand, H., Varela, I., Liu, P.Q., Paschon, D.E., Miranda, E., Ordóñez, A., Hannan, N.R., Rouhani, F.J., et al. (2011). Targeted gene correction of  $\alpha$ 1-antitrypsin deficiency in induced pluripotent stem cells. *Nature* 478, 391–394.

## Stem Cell Reports, Volume 2

### Supplemental Information

#### **Genetic and Chemical Correction of Cholesterol Accumulation and Impaired Autophagy in Hepatic and Neural Cells Derived from Niemann-Pick Type C Patient-Specific iPSC Cells**

Dorothea Maetzel, Sovan Sarkar, Haoyi Wang, Lina Abi-Mosleh, Ping Xu, Albert W. Cheng, Qing Gao, Maisam Mitalipova, and Rudolf Jaenisch

### Inventory of Supplemental Information

#### **Supplementary Figures**

Figure S1: Generation and Characterization of NPC Patient-Specific iPSCs,

Related to Figure 1

Figure S2: Correction of *NPC1*11062T Mutation in Patient-Specific iPSCs, Related to Figure 2

Figure S3: Analysis of Cholesterol Metabolism in isogenic NPC1 iPSC-Derived Cells, Related to Figure 3

Figure S4: Genetic Correction of Autophagy Phenotype in NPC1 iPSC-derived cells, Related to Figure 4

Figure S5: Chemical Correction of Autophagy Phenotype in NPC1 iPSC-derived cells, Related to Figure 5

Table S1: Summary of TALEN-mediated Genome Editing, Related to Figure 2

#### **Supplementary Methods**

Describing details of methodologies used



## **Supplementary References**

References related to Supplementary Methods

## **Supplementary Note**

Describing statistical analyses (p values) of Main Figures

# Figure S1

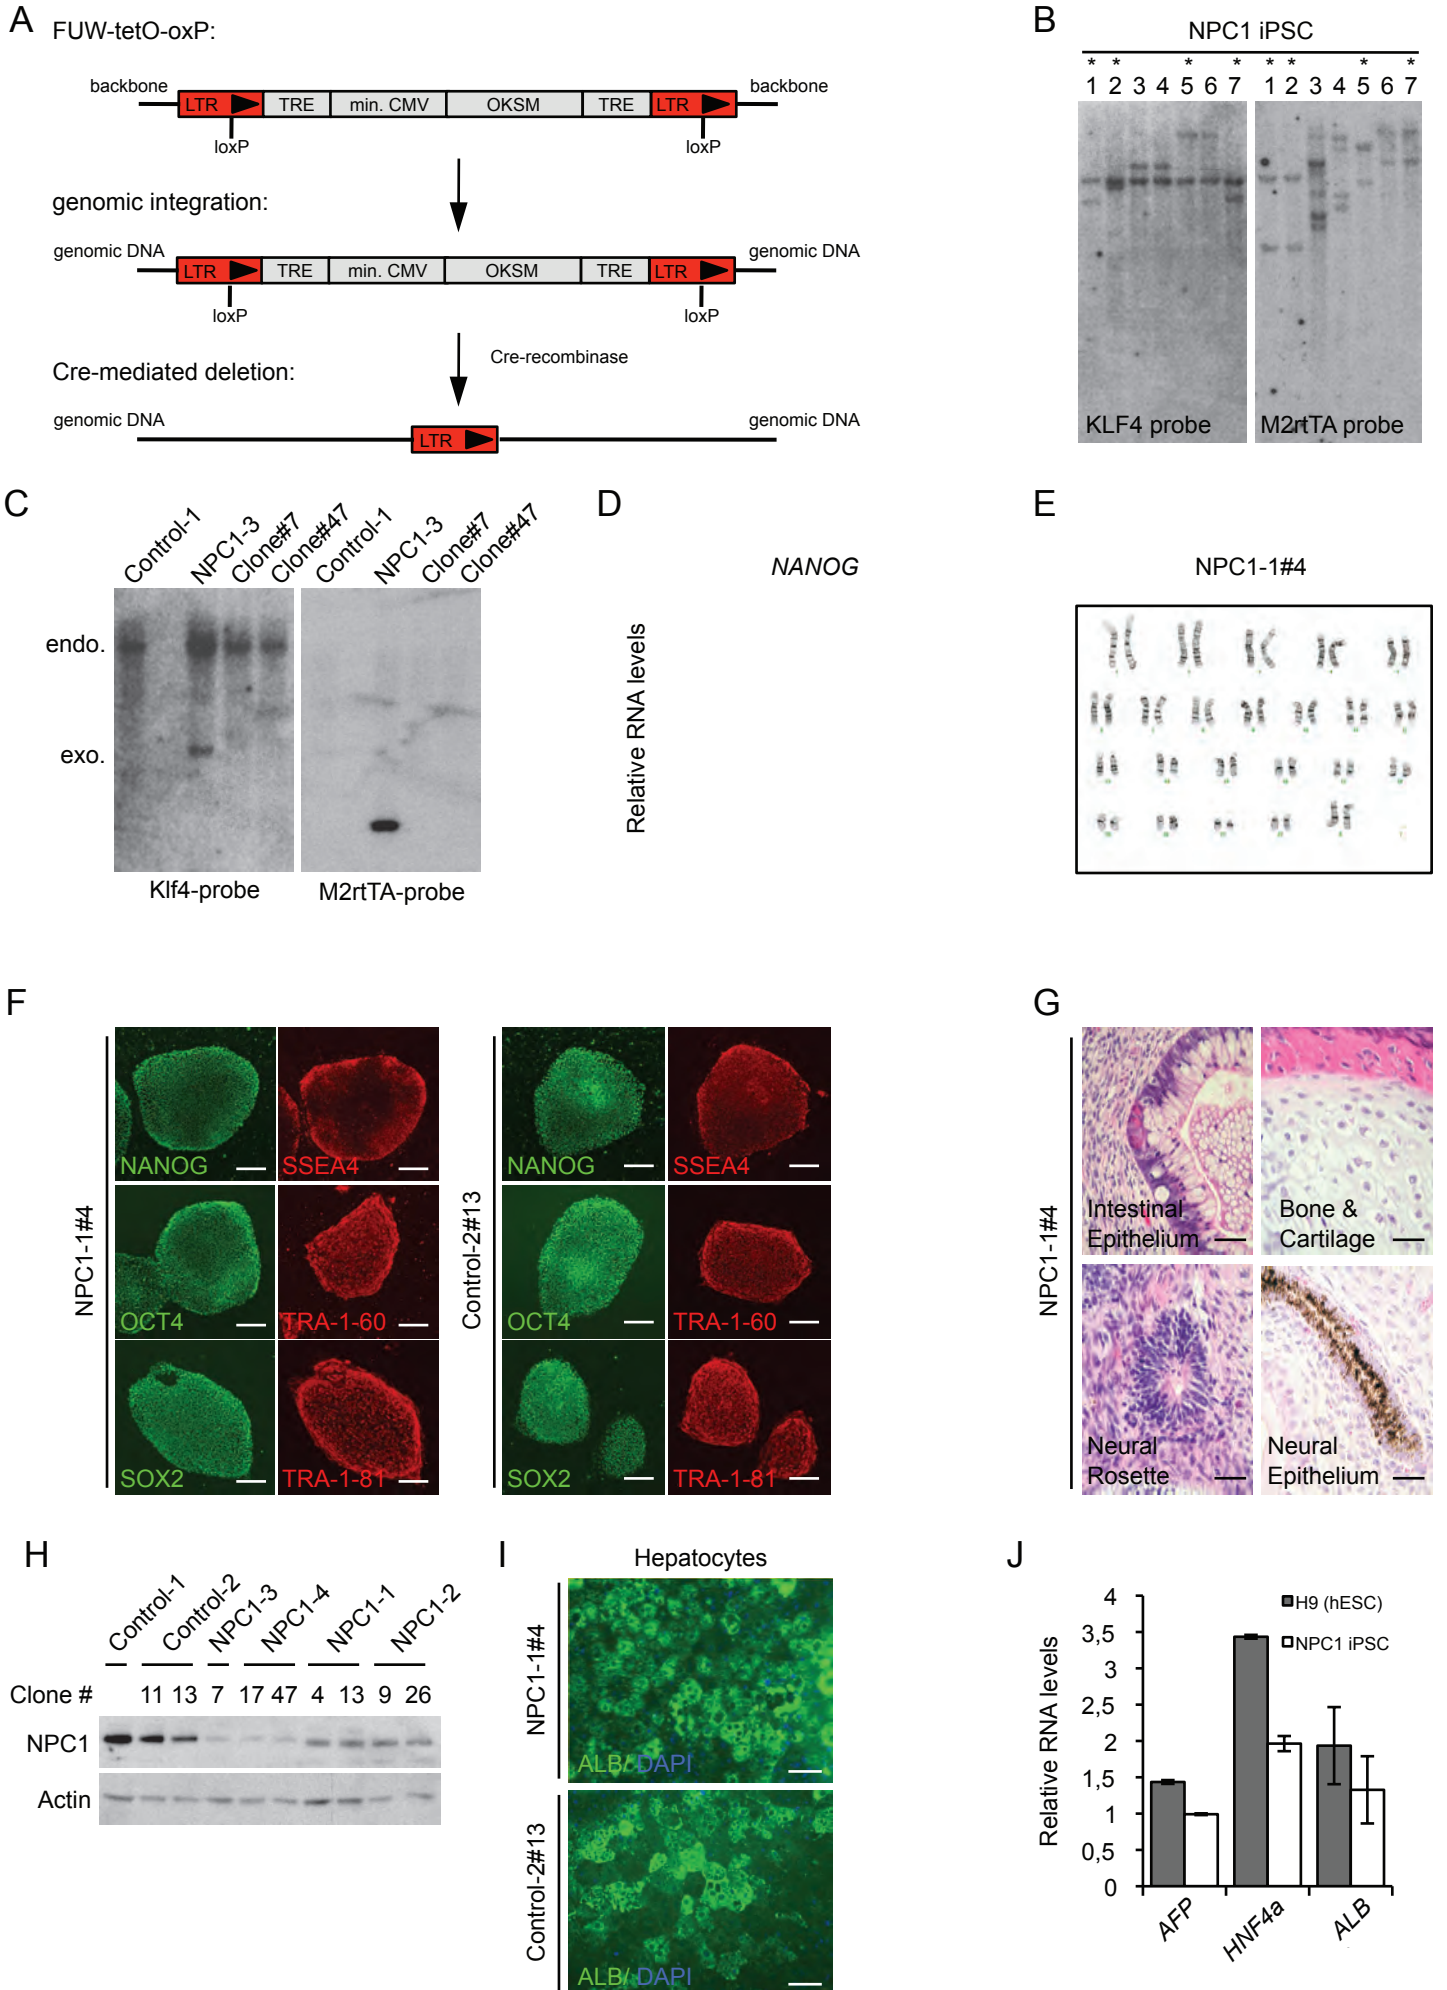

Figure S2

A

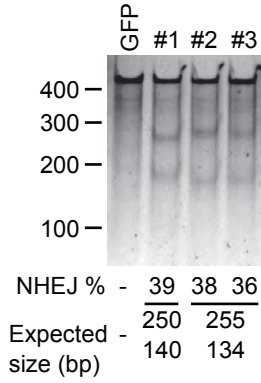

B

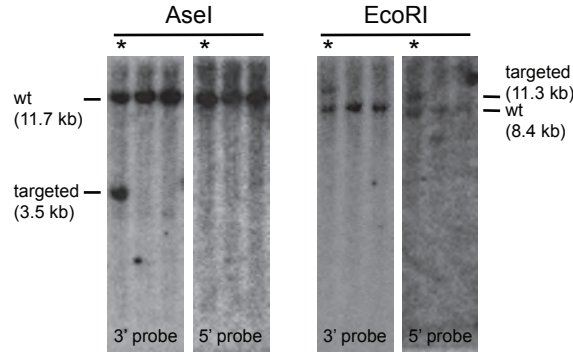

C

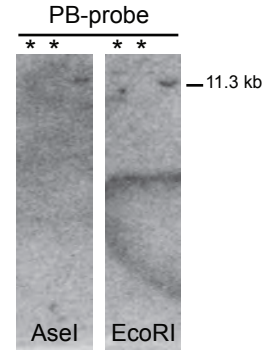

D

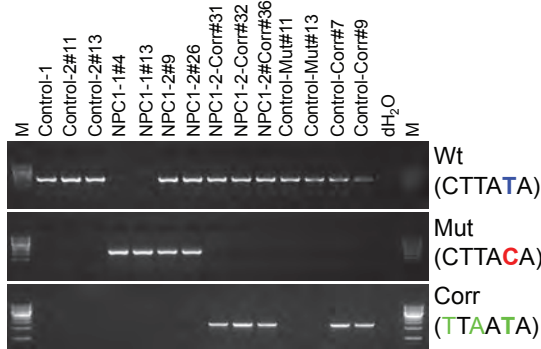

E

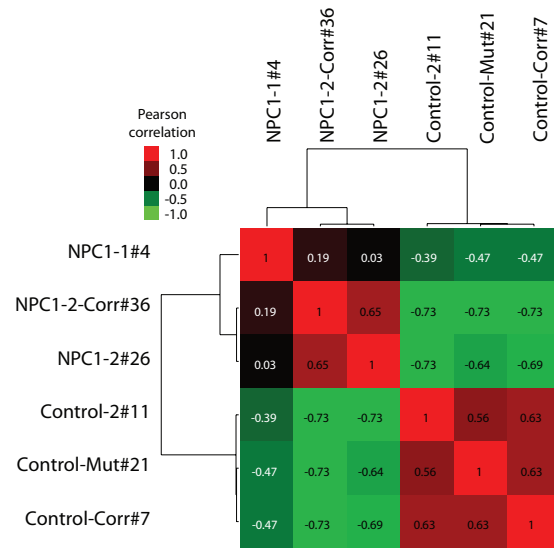

F

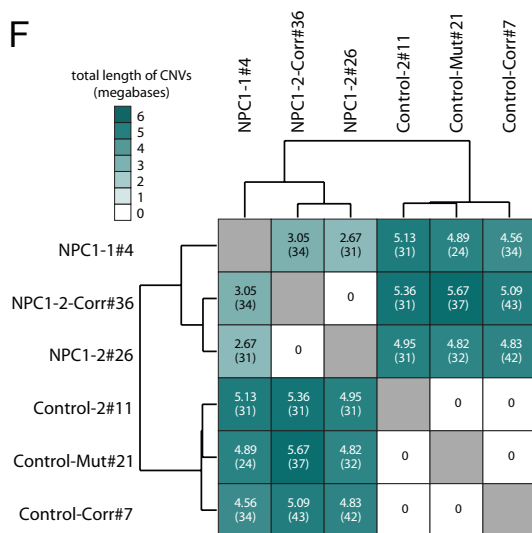

G

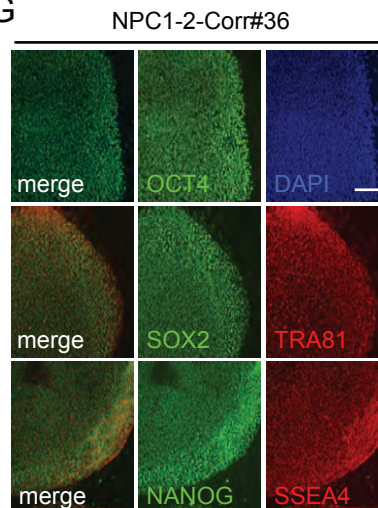

H

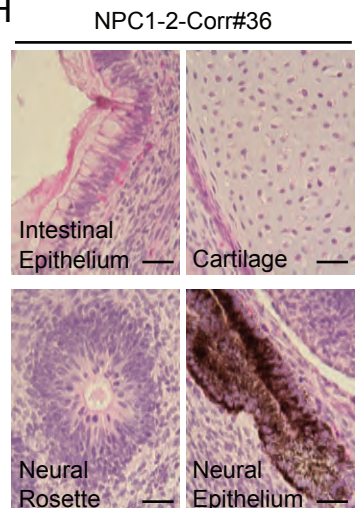

Figure S3

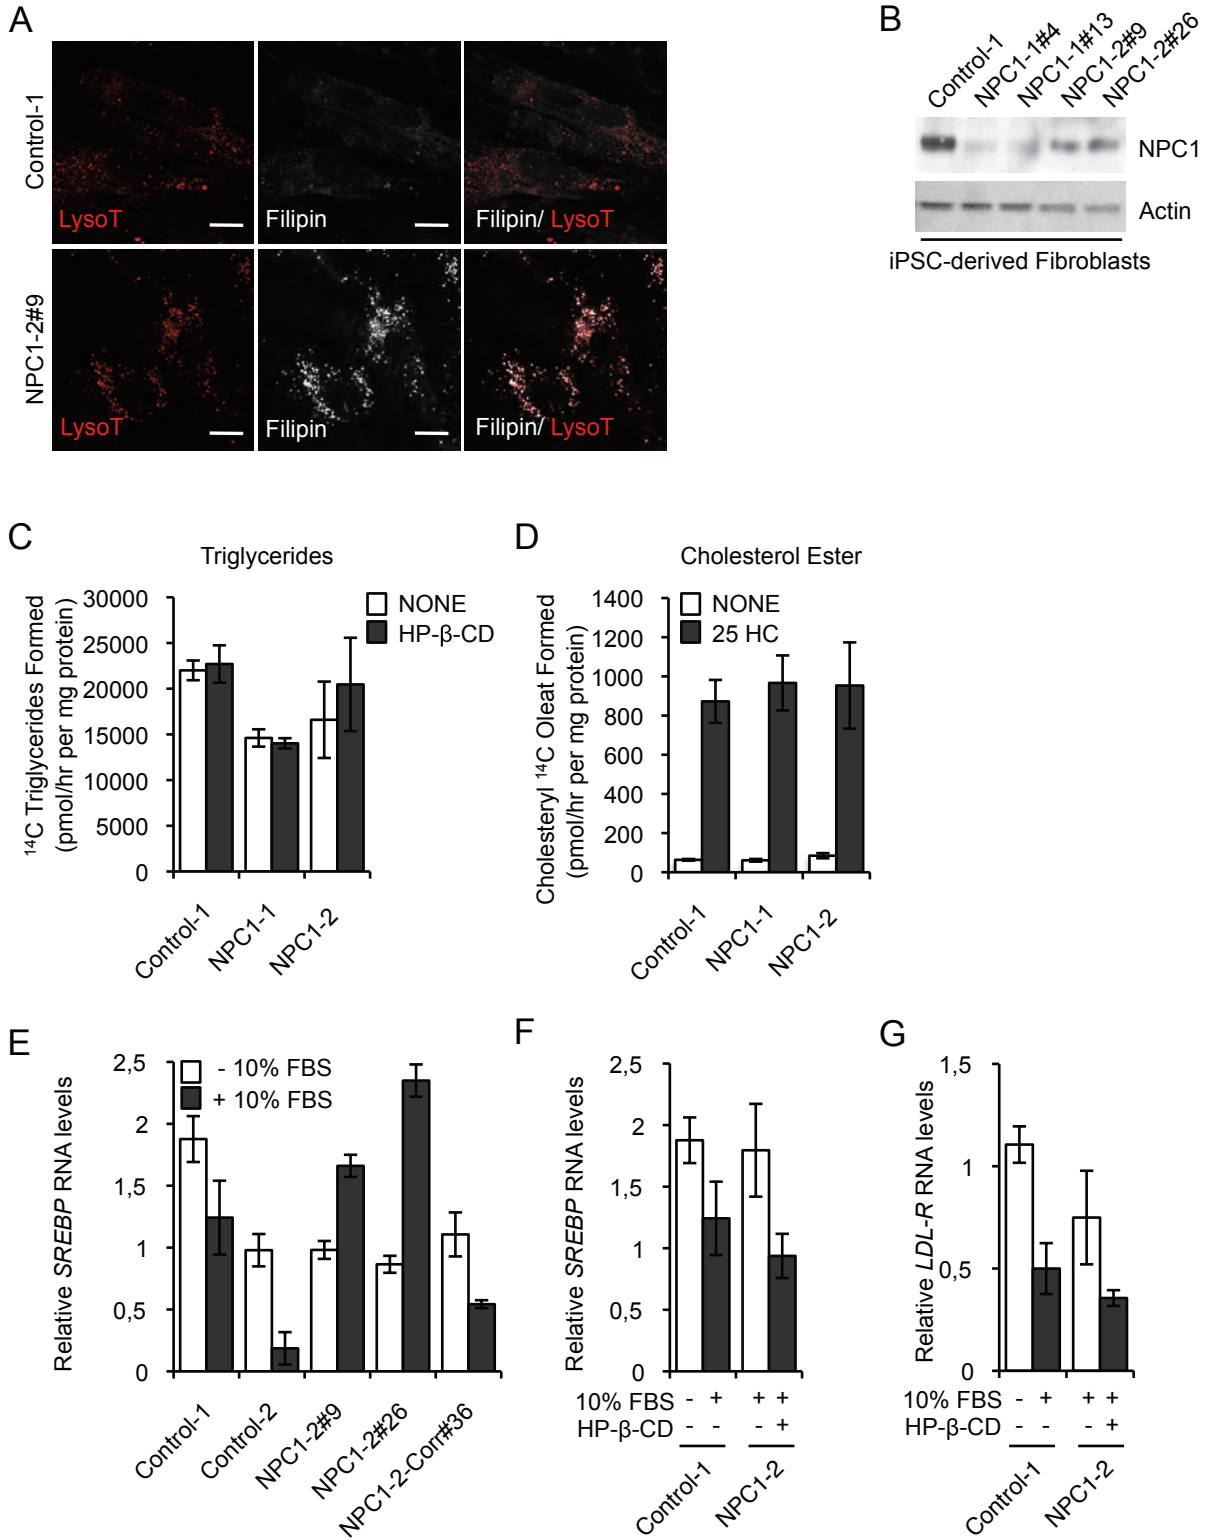

Figure S4

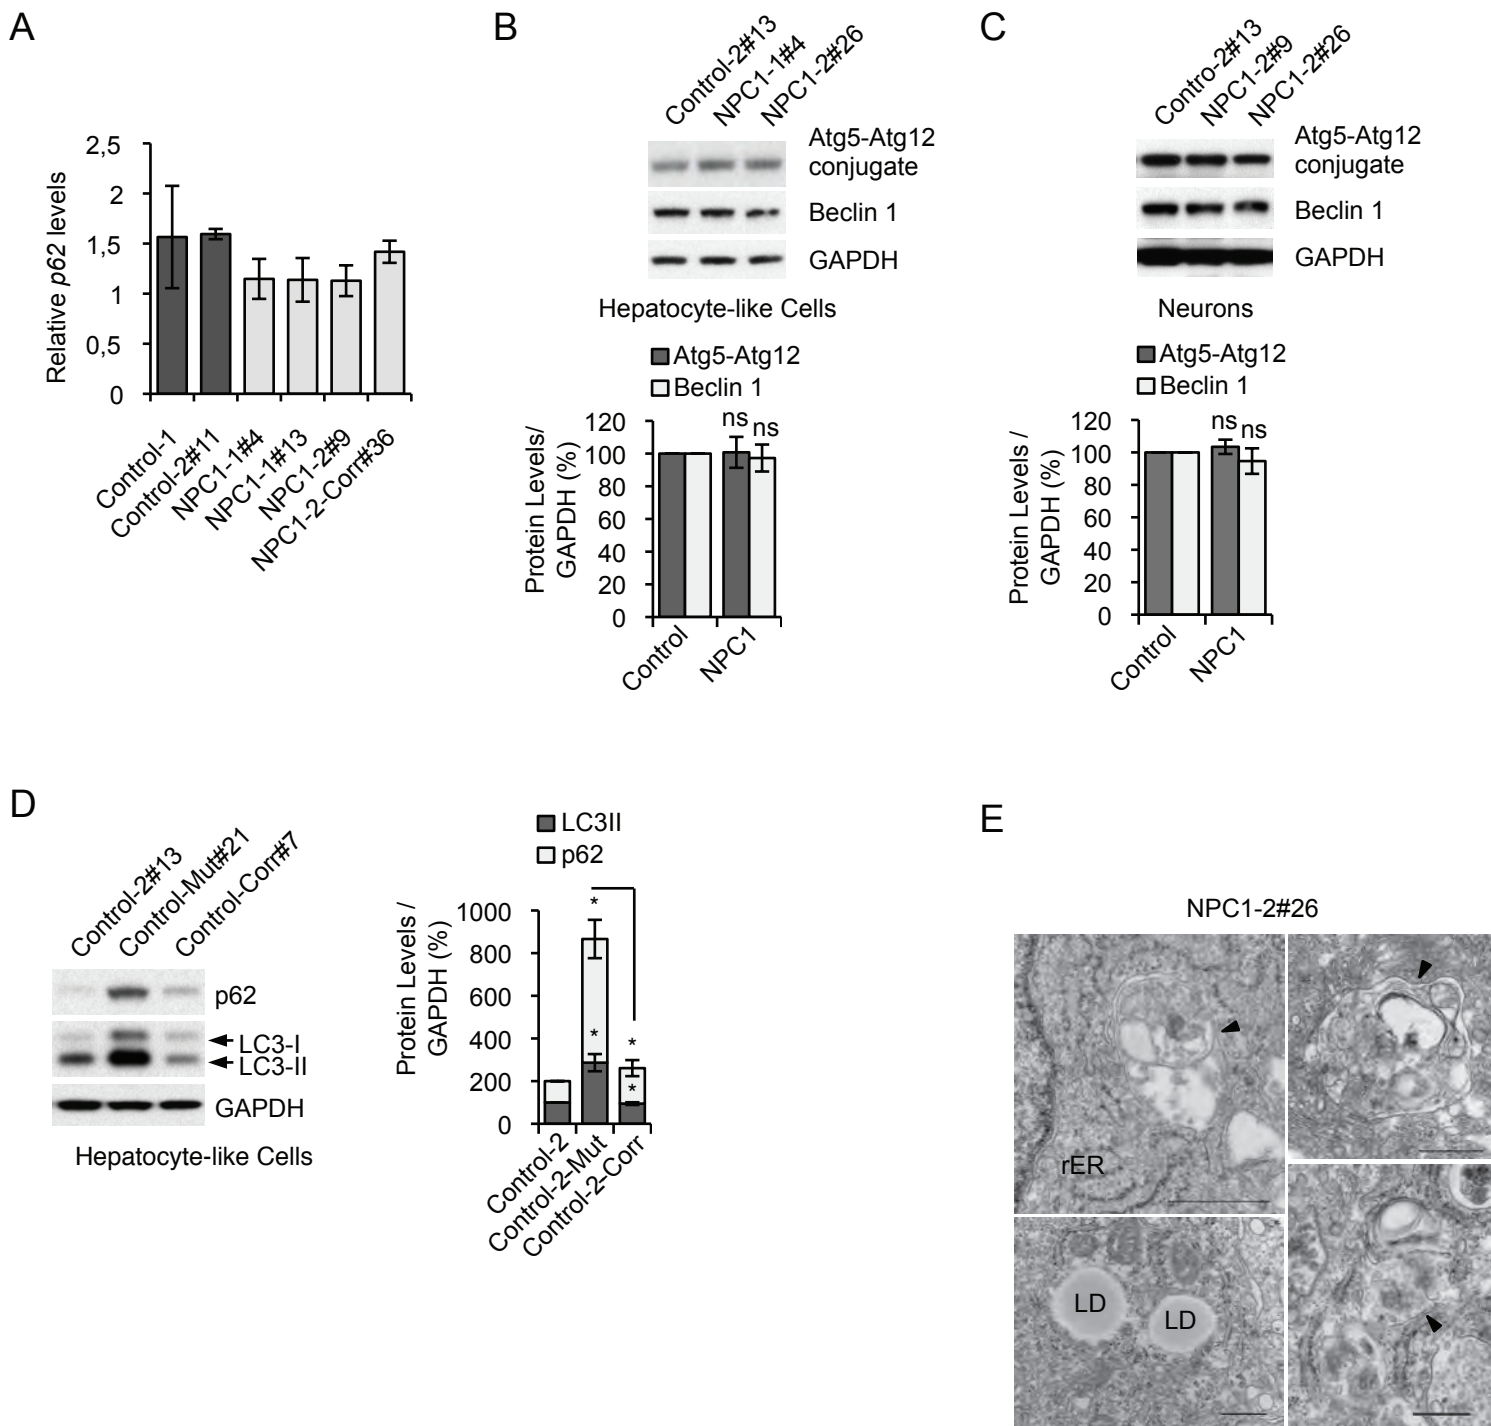

Figure S5

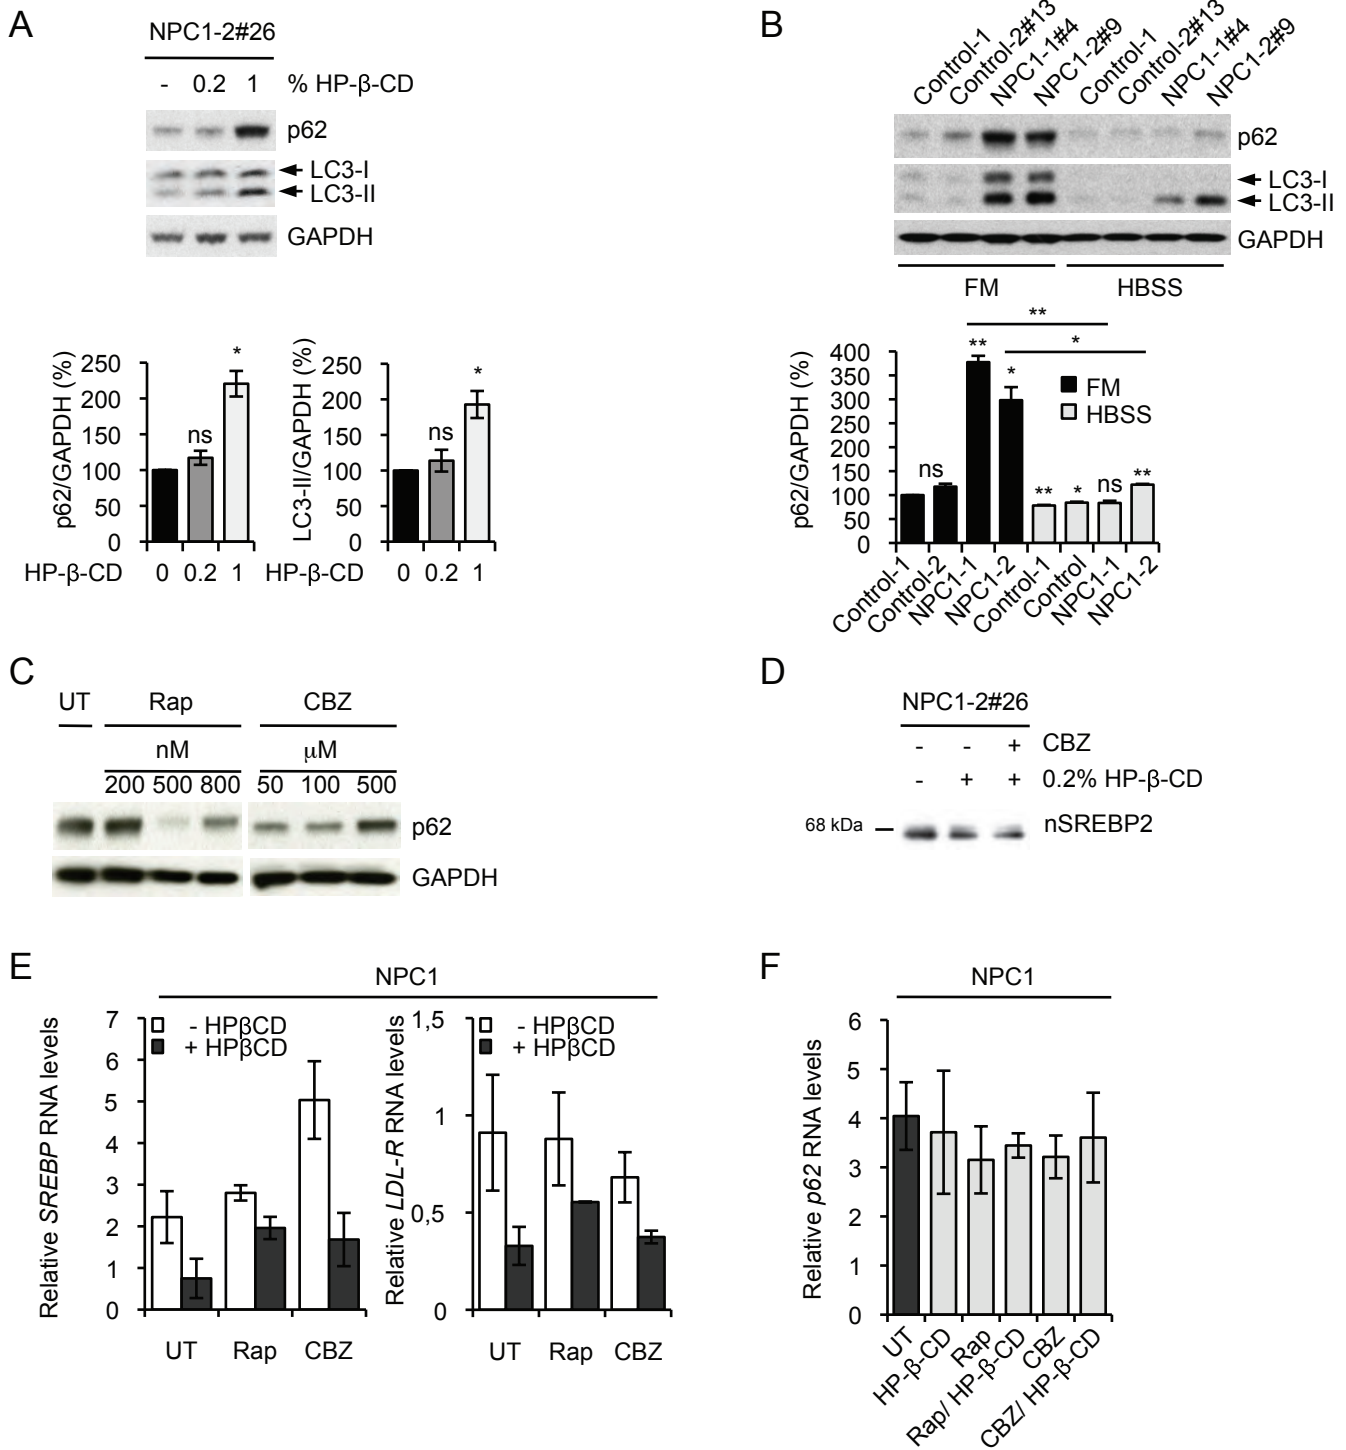

**G** Table: Effect of Autophagy Inducers used in Hepatic and Neuronal Cultures

| Autophagy Inducer   | Mechanism of Action                         | Concentration | Effective in:         |                   |
|---------------------|---------------------------------------------|---------------|-----------------------|-------------------|
|                     |                                             |               | Hepatic-like cultures | Neuronal cultures |
| Rapamycin (Rap)     | mTORC1 Inhibitor                            | 500 nM        | Yes                   | Yes               |
| Carbamazepine (CBZ) | Inositol and IP <sub>3</sub> reducing agent | 100 μM        | Yes                   | Yes               |
| Verapamil (Ver)     | Ca <sup>2+</sup> channel blocker            | 5 μM          | No                    | Yes               |
| Trehalose (Tre)     | unknown                                     | 10 nM         | No                    | Yes               |
| SMER28              | unknown                                     | 100 μM        | No                    | n/a               |

Table S1: Summary of TALEN-mediated Genome Editing

| Cell Line                              | TALEN Pair/<br>Donor Vector | Number of Clones Analyzed | Number of Clones with Modified Tareget Locus | Number of Clones Treated with Transposaes | Number of Correctly Targeted/<br>Analyzed Clones | Number of Off-Target Modifications/<br>Tested Sites | Clone ID                  | Cell Line                                   |
|----------------------------------------|-----------------------------|---------------------------|----------------------------------------------|-------------------------------------------|--------------------------------------------------|-----------------------------------------------------|---------------------------|---------------------------------------------|
| WIBR-IPS-NPC1 <sup>1920delG/wt</sup>   | 12/ PB                      | 117                       | 4<br>(2 wt allele)                           | 2                                         | 2 / 81                                           | 0 / 10                                              | control-Corr<br>(#7, #9)  | WIBR-IPS-NPC1 <sup>1920delG/corr</sup>      |
| WIBR-IPS-NPC1 <sup>P237S/ I1061T</sup> | 12/ PB                      | 146                       | 5<br>(4 I1062T allele)                       | 5                                         | 2 / 287                                          | 0 / 10                                              | NPC1-2-Corr<br>(#32, #36) | WIBR-IPS-NPC1 <sup>P237S/ I1062T-Corr</sup> |

**Supplemental Figures and Tables**

**Figure S1: Generation and Characterization of NPC Patient-Specific iPSCs, Related to Figure 1**

(A) Schematic overview depicting the reprogramming strategy used to generate factor-free NPC patient-specific iPSCs using the FUW-tetO-loxP polycystronic vector.

(B) Southern blot analysis showing number of integrations of FUW-tetO-loxP and M2rtTA-loxP respectively in derived NPC1 iPSCs. Genomic DNA was digested with BamHI and hybridized with an internal Klf4 and M2rtTA-probe respectively. Lanes 1 to 7 contain different NPC1 iPSC clones of one representative fibroblast line. Clones with the lowest number of integrations are marked with an asterisk.

(C) Southern blot analysis showing derived NPC1 iPSCs before and after Cre-mediated excision of FUW-tetO-loxP and M2rtTA-loxP. Genomic DNA was digested with HindIII and hybridized with an internal Klf4- and M2rtTA-probe respectively. Fragment sizes for each digest are indicated.

(D) Quantitative RT-PCR assay for expression analyses of endogenous pluripotency marker, *NANOG*. Data shown are relative to *GAPDH*. Graphical data represent mean  $\pm$  SD (n = 2) of independent experiments.

(E) Karyotype analysis of a representative NPC1 iPSC line.

(F) Immunofluorescence staining for pluripotency markers NANOG, OCT4, SOX2, SSEA4, TRA-1-60 and TRA-1-81 in one representative NPC1 iPSCs and Control-2 line (scale bar 200  $\mu$ m).

(G) Hematoxylin and eosin staining of teratoma section generated from a representative NPC1 iPSC line (scale bar 50  $\mu$ m).



(H) Immunoblot analysis in NPC1 iPSC and Control lines with NPC1 and Actin antibodies detecting NPC1 protein levels in indicted clones.

(I) Immunofluorescence staining of hepatocyte-like cultures derived from a representative NPC1 iPSC and Control-2 iPSC line 21 days after induction of hepatocyte differentiation for human Albumin (ALB; green). Nuclei are stained with DAPI (blue) (scale bar 100  $\mu\text{m}$ ).

(J) Quantitative RT-PCR expression analyses of hepatocyte-specific markers, such as  $\alpha$ -fetoprotein (AFP), HNF4 $\alpha$  and Albumin (ALB), 21 days after induction of differentiation. Data shown are relative to *GAPDH*. Graphical data represent mean  $\pm$  SD (n = 2) of independent experiments.

**Figure S2: Correction of *NPC1*<sup>I1061T</sup> Mutation in Patient-Specific iPSCs, Related to Figure 2**

(A) Assay of TALEN activity with the Surveyor nuclease. The *NPC1* locus was amplified and modification of the locus was measured using the Surveyor nuclease. The expected sizes of correctly digested fragments are indicated. Cleavage efficiency was quantified and shown below each lane. GFP indicates GFP control transfection.

(B) Southern blot analysis of NPC1-2 line targeted with PB donor plasmid PB-NPC1-I1061T. Genomic DNA was digested with indicated enzymes and hybridized with the external 3' and 5' probe. Fragment sizes of wild type (wt) and targeted alleles for each digest are indicated. Correctly targeted clones are marked with an asterisk.

(C) Southern blot analysis of NPC1 iPSCs targeted with PB donor plasmid PB-*NPC1*<sup>I1061T</sup> after excision of PB-TR flanked selection cassette. Genomic DNA was digested with indicated enzymes and hybridized with a PB-probe. Fragment size of

targeted allele is indicated. Clones showing no residual PB integration are marked with an asterisk.

(D) PCR of indicated cell lines was performed with specific primers detecting wild type (wt, upper lane), mutant (Mut, middle lane) and corrected (Corr, lower lane) sequence in *NPC1* locus.

(E) Genome wide copy number variation (CNV) analysis showing the correlation of indicated NPC1 iPSC lines and their isogenic counterparts. Values indicate the Pearson correlation coefficient between copy number profiles. Allosomes were excluded.

(F) Matrix showing the total length of CNVs (in mega bases, including gain and loss) identified in each pair-wise comparison, with the number of CNV regions in parentheses. Minimum CNV width was defined as 30kb and allosomes were excluded.

(G) Immunofluorescence for pluripotency markers, such as OCT4, SOX2, Tra-1-81, NANOG and SSEA4, in one representative NPC1-2-Corr clone (scale bar 100  $\mu\text{m}$ ).

(H) Hematoxylin and eosin staining of teratoma sections from one representative NPC1-2-Corr clone (scale bar 50  $\mu\text{m}$ ).

**Figure S3: Analysis of Cholesterol Metabolism in isogenic NPC1 iPSC-Derived Cells, Related to Figure 3**

(A) LysoTracker and Filipin staining in representative Control-2 and NPC1 iPSC derived fibroblast lines. Results shown are representative of two independent experiments. Scale bar 10  $\mu\text{m}$ .

(B) Immunoblot analysis showing NPC1 and Actin protein levels in fibroblasts derived from indicated NPC1 iPSC lines. Data shown are representative for two independent experiments.

(C) Triglycerides synthesis in hepatic cultures derived from indicated Control and NPC1 iPSC lines after HP- $\beta$ -Cyclodextrin (HP- $\beta$ -CD) treatment. Mean variation for each of the duplicate incubations for Control-1, NPC1-1 and NPC1-2 were in a range between 0.1 and 39% respectively.

(D) Cholesteryl ester formation in hepatic cultures derived from indicated Control and NPC1 iPSC lines after treatment with 25-hydroxycholesterol (25-HC). Mean variation for each of the duplicate incubations for Control-1, NPC1-1 and NPC1-2 were a range between 2 and 14% respectively.

(E) Quantitative RT-PCR assay for expression analyses of *SREBP* RNA levels in NPC1 iPSC-derived hepatic cultures of control (Control-1, Control-2), NPC1-deficient (NPC1-1, NPC1-2) and corrected (NPC1-2-Corr) before (-) and after (+) exposure to 10% FBS. Data shown are relative to *GAPDH*. Graphical data represent mean  $\pm$  SD (n = 3).

(F) Quantitative RT-PCR assay for expression analyses of *SREBP* RNA levels in NPC1 iPSC-derived hepatic cultures comparing Control-1 after exposure to 10% FBS and NPC1-2 line after 0.2% HP- $\beta$ -CD treatment as indicated below the graph. Data shown are relative to *GAPDH*. Graphical data represent mean  $\pm$  SD (n = 3).

(G) Quantitative RT-PCR assay for expression analyses of *LDL-R* RNA levels in NPC1 iPSC-derived hepatic cultures comparing Control-1 line after exposure to 10% FBS and NPC1-2 line after exposure to 10% FBS and 0.2% HP- $\beta$ -CD treatment as indicated. Data shown are relative to *GAPDH*. Graphical data represent mean  $\pm$  SD (n = 3).

(E-G) Results shown are representative for at three independent experiments.

**Figure S4: Genetic Correction of Autophagy Phenotype in NPC1 iPSC-derived cells, Related to Figure 4**

## Genetic and Chemical Correction of NPC1 Deficiency

(A) Quantitative RT-PCR expression analyses of *p62* RNA levels in Control-1 and NPC1 iPSC-derived hepatic cultures. Data shown are relative to *GAPDH*. Graphical data represent mean  $\pm$  SD (n = 2).

(B, C) Immunoblot analysis and quantification of Beclin-1 and Atg5-Atg12 conjugation levels using anti-Beclin-1, anti-Atg5 and anti-GAPDH antibodies in Control and NPC1 iPSC-derived hepatic (B) and neuronal cultures (C). Graphical data represent mean  $\pm$  SE (n = 3). *p* values of Beclin-1 levels compared to Control sample: 0.7731 (NPC1) (B); 0.1863 (NPC1) (C). *p* values of Atg5-Atg12 conjugation levels compared to Control sample: 0.9432 (NPC1) (B); 0.3897 (C).

(D) Immunoblot analysis and quantification of p62 and LC3-II levels in hepatic cultures derived from Control-2 after disruption and repair of the *NPC1* wt allele using specific antibodies. *p* values compared to Control sample: 0.0333 (p62, Control-2-Mut), 0.2195 (p62, Control-2-Corr); 0.0435 (LC3-II, Control-2-Mut), 0.4756 (LC3-II, Control-2-Corr). *p* values compared to Control-2-Mut sample: 0.0299 (p62, Control-2-Corr), 0.0383 (LC3-II, Control-2-Corr).

(A-D) Results shown are representative of at least two independent experiments using different clones of each line. \*\*\*, *p* < 0.001; \*\*, *p* < 0.01; \*, *p* < 0.05; ns, non-significant.

(E) Representative electron microscopy images of autophagic vacuoles assessed in NPC1 iPSC-derived hepatic-like cells. Lipid droplets (LD), rough endoplasmatic reticulum (rER) are indicated. Scale bar, 500 nm.

**Figure S5: Chemical Correction of Autophagy Phenotype in NPC1 iPSC-derived cells, Related to Figure 5**

(A) Immunoblot analysis and quantification of p62 and LC3-II levels using anti-p62, anti-LC3 and anti-GAPDH antibodies in NPC1 iPSC-derived hepatic cultures, either left untreated or treated with indicated concentrations of HP- $\beta$ -Cyclodextrin (HP- $\beta$ -CD) over 5 days. Graphical data represent mean  $\pm$  SE (n = 3). *p* values of p62 levels compared to untreated sample: 0.2233 (0.2% HP- $\beta$ -CD); 0.0213 (1% HP- $\beta$ -CD). *p* values of LC3-II levels compared to untreated sample: 0.4614 (0.2% HP- $\beta$ -CD); 0.0395 (1% HP- $\beta$ -CD).

(B) Immunoblot analysis and quantification of p62 levels using anti-p62 and anti-GAPDH antibodies in Control and NPC1 iPSC-derived hepatic cultures, cultured either in basal (full medium; FM) or starvation (HBSS) condition. Graphical data represent mean  $\pm$  SE (n = 3). *p* values of p62 levels compared to Control-1 FM sample: 0.1033 (Control-2 FM); 0.0023 (NPC1-1 FM); 0.0184 (NPC1-2 FM); 0.0036 (Control-1 HBSS); 0.0155 (Control-2 HBSS); 0.0699 (NPC1-1 HBSS); 0.0055 (NPC1-2 HBSS). *p* values of p62 levels compared to NPC1-1 FM sample: 0.0023 (NPC1-1 HBSS). *p* values of p62 levels compared to NPC1-2 FM sample: 0.0232 (NPC1-2 HBSS).

(C) Immunoblot analysis of p62 levels using anti-p62 and anti-GAPDH antibodies in NPC1 iPSC-derived hepatic cultures using indicated concentrations of rapamycin (Rap) and carbamazepine (CBZ). Note that CBZ-treated section (right) is part of the same immunoblot (on the left), where the intermediate lanes have been excised for simplifying representation.

(D) Immunoblot of nuclear sterol regulatory element-binding protein 2 (SREBP2) in NPC1-2 hepatic cells after incubation with 10% FBS and treatment with 0.2% HP- $\beta$ -Cyclodextrin (HP- $\beta$ -CD) alone or in combination with CBZ. Protein sizes are indicated.

(E) Quantitative RT-PCR expression analyses of *SREBP* and low density lipoprotein receptor (*LDL-R*) RNA levels in NPC1 iPSC-derived hepatic cultures after treatment with 0.2% HP- $\beta$ -CD alone or in combination with Rap or (CBZ). Data is shown are relative to *GAPDH*. Graphical data represent mean  $\pm$  SD (n = 3).

(F) Quantitative RT-PCR expression analyses of *p62* RNA levels in Control and NPC1 iPSC-derived hepatic cultures. Data shown are relative to *GAPDH*. Graphical data represent mean  $\pm$  SD (n = 3).

(G) Table: Effect of autophagy inducers used in hepatic-like and neuronal cultures with working concentration indicated.

Results shown are representative of at least three independent experiments using different clones of each line. \*\*\*,  $p < 0.001$ ; \*\*,  $p < 0.01$ ; \*,  $p < 0.05$ ; ns, non-significant.

**Table S1: Summary of TALEN-mediated Genome Editing, Related to Figure 2**

## **Supplemental Methods**

### **Cell culture**

HESCs WIBR3 (Whitehead Institute Center for Human Stem Cell Research, Cambridge, MA) (Lengner et al., 2010) and hiPSCs were cultivated as described previously (Hockemeyer et al., 2008; Soldner et al., 2009). Briefly, hiPSCs and hESCs were maintained on mitomycin C inactivated mouse embryonic fibroblast (MEF) feeder layers in hESC medium [DMEM/F12 (Invitrogen) supplemented with 15% fetal bovine serum (FBS) (Hyclone), 5% KnockOut Serum Replacement (Invitrogen), 1 mM glutamine (Invitrogen), 1% nonessential amino acids (Invitrogen), 0.1 mM  $\beta$ -mercaptoethanol (Sigma) and 4 ng/ml FGF2 (R&D Systems)]. Cultures were passaged every 5 to 7 days either manually or enzymatically with collagenase type IV (Invitrogen; 1.5 mg/ml). Differentiation into hepatic-like cells and neurons was induced as described previously (Si-Tayeb et al., 2010). Briefly, hiPSCs were plated on matrigel coated plates as single cells and cultured in ROCK inhibitor 24 hr. After reaching 80% confluence differentiation was initiated following published protocols. As described previously neuro progenitors (NPs) and neurons were derived using an embryoid body (EB) based protocol (Marchetto et al., 2010).

### **Lentiviral Infection and derivation of transgene-free hiPSC**

Transgene-free hiPSCs were generated as described previously (Soldner et al., 2009; Takahashi et al., 2007). Briefly, VSV-G pseudotyped lentiviruses encoding a cre-excisable and doxycycline-inducible polycistronic Oct4, Klf4, Sox2 and c-Myc expression cassette (pHAGE2-tetOminiCMV-hSTEMCCA) (Sommer and Mostoslavsky,

2010) or a constitutive reverse tetracycline transactivator flanked by loxP sites (FUW-M2rtTA) (Hockemeyer et al., 2008) were generated in 293T cells (Brambrink et al., 2008). Four consecutive infections of NPC1 patient fibroblasts were performed over a period of 48 hr. Patient fibroblasts lines (Coriell Institute for Medical Research) were passaged and re-plated five days after transduction. Reprogramming was induced 48 hr after plating using hESC medium containing doxycycline (Sigma-Aldrich; 2 mg/ml). HiPSC colonies were picked between 3 and 5 weeks after doxycycline-induction and maintained in the absence of doxycycline. Individual clones were analyzed by Southern blot. Genomic DNA was separated on a 0.7% agarose gel after restriction digest with EcoRI, transferred to a nylon membrane (Amersham) and hybridized with <sup>32</sup>P random primer (Stratagene) labeled probes against hKLF4 (full length hKLF4 cDNA), and M2rtTA (full length M2rtTA cDNA). hiPSC clones with the lowest number of integrations were chosen for transgene excision. hiPSC lines were cultured in ROCK inhibitor (Stemgent) 24 hr prior to electroporation. Cells were harvested using 0.05% trypsin/EDTA solution (Invitrogen), resuspended in PBS and co-transfected with pTurbo-Cre (40 mg; GenBank Accession Number AF334827) and pEGFP-N1 (10 mg; Clontech) by electroporation (Gene Pulser Xcell System, Bio-Rad: 250 V, 500 mF, 0.4 cm cuvettes). Excision of the reprogramming transgenes and the M2rtTA transactivator was confirmed by southern blot as described above using HindIII digestion.

### **Teratoma Formation and Karyotype Analysis**

HiPSCs were collected and resuspended in 150 µl of PBS. Cells were injected subcutaneously in the back of SCID mice (two mice per cell line, Taconic). After 4 to 8 weeks mice were euthanized, tumors were isolated and fixed in formalin. Samples were



paraffin imbedded, sectioned and analyzed based on hematoxylin and eosin staining. Karyotype analysis of generated hiPSCs was performed by Cell Line Genetics (Madison, WI).

### **Immunostaining**

Immunostaining was performed according to standard protocols using the following primary antibodies: hSOX2 (goat polyclonal, R&D Systems); Oct-3/4 (mouse monoclonal, Santa Cruz Biotechnology); hNANOG (Cat. No. AF1997, goat polyclonal, R&D Systems); SSEA4 (mouse monoclonal, Developmental Studies Hybridoma Bank); Tra-1-60, (mouse monoclonal, Chemicon International); Tra-1-60, (Cat. No. MAB4360, mouse monoclonal, Millipore); AFP (Cat. No. A8452, mouse monoclonal, Sigma), HNF4a (goat polyclonal, Santa Cruz), hAlb (Cat. No. CL2513A, mouse monoclonal, Cedarlane), TuJ1 (mouse monoclonal, Covance); MAP2 (rabbit polyclonal, Sigma); Nestin (Cat. No. AB5922, mouse monoclonal, Milipore), Pax6 (Cat. No. PRB-278P, rabbit polyclonal, Covance); appropriate Alexa Fluor dye conjugated secondary antibodies (Invitrogen) were used. Visualization of lysosomes in fixed cells was performed using LysoTracker Red DND-99 according to the manufacturer protocol (Life Technologies). Slides were mounted with Fluoromount G (Emsdiasum) and analyzed (LSM710, Zeiss; Eclipse Ti - Nikon). Images were taken using LSM710 confocal microscope (Zeiss) or inverted microscope (Eclipse Ti - Nikon).

### **Apoptosis assay**

FITC-Annexin V and Propidium Iodine staining were performed according to manufacturer instructions (BD Biosciences). Cells were analyzed using LSR FACS.

Detection and quantification of apoptotic cells in neuronal cultures was performed by counting fragmented nuclei and based on labeling of DNA strand breaks (TUNEL technology) according to manufacturer instructions (*In situ* Cell Death Detection Kit, Roche).

### **RT-PCR**

Total RNA of cells was prepared according to the manufacturer's instructions (Qiagen) and DNase-treated (R&D). A total of 300 ng of total RNA was reverse transcribed. Control PCRs were performed using *Gapdh* primers. Products were separated on a 2% agarose gel. PCR primers used were published previously (Funakoshi et al., 2011; Soldner et al., 2009). For quantitative PCR, reactions were performed with SYBR Green dye (Applied Biosystems). Results were analyzed using the delta-delta Ct method with *Gapdh* as a normalization control. Error bars are indicating s.d. of biological triplicates.

### **Immunoblot analysis**

Cell pellets were lysed on ice in Lysis Buffer (10 mM Tris-HCl pH 7.4, 2% sodium dodecyl sulphate, 1 mM DTT, 10% glycerol, and 120 mg/ml urea) for 30 min in presence of Complete EDTA-free Protease Inhibitor Cocktail (Roche Diagnostics), boiled for 10 min at 95°C and subjected to SDS-PAGE and immunoblot analysis. Blots were blocked with 10% non-fat milk powder in PBS-Tween 20 for 1 h at RT. Primary antibodies used were mouse NPC1 (Cat. No. AT3083a, mouse, monoclonal; ABGENT), Actin (Cat. No. sc-1616, goat, polyclonal; Santa Cruz), SREBP2 (1D2, mouse, monoclonal, J.L. Goldstein & M.S. Brown Lab), p62 (Cat. No 610832, mouse,

monoclonal; BD Bioscience), LC3 (Cat. No. NB100-2220, rabbit, polyclonal; Novus Biologicals), GAPDH (Cat. No. sc-47724, mouse, monoclonal; Santa Cruz), Atg5/Atg12 protein complex (Cat. No. 0262-100/ATG5-7C6, mouse, monoclonal, Nanotools), and Beclin 1 (Cat. No. 3738, rabbit, polyclonal; Cell Signaling Technology) respectively in concentrations as recommended. Blots were incubated with primary antibodies overnight at 4°C or 1 h at RT. Subsequently immunoblots were probed with anti-mouse, anti-rabbit, and anti-guinea pig IgG-HRP (H+L) secondary antibody respectively (1:5,000 dilutions, Cat. No. 401253, Cat. No. 401393, all EMD Biosciences) for 1 h at room temperature, and visualized using Amersham ECL Western Blotting Detection Reagent (GE Healthcare).

### **NPC1 TALENs Recognition Sequences and Prediction of off-target sites**

The position weight matrices (PWMs) of NPC1 TALENs (NPC1Left and NPC1Right) were constructed using model 3 as described (Moscou and Bogdanove, 2009) with a pseudo-weight of 0.99 for observed di-residues. A PWM  $\{P_{ij}\}$  of width  $w$  (where  $i$  is a position from 1 to  $w$  and  $j$  is a nucleotide from  $\{A,C,G,T\}$ ) was converted into a position score matrix (PSM)  $S_{ij}=10^3\log_2(P_{ij})$ . The score of a potential binding site is defined as the sum of the scores of each position of the binding site against the PSM. A relative score was then calculated by subtracting the score of the site by the score of the consensus sequence. The relative score represents the relative affinity (in  $\log_2$ ) for binding to that site compared to a site with the consensus sequence. All NPC1Left binding sites (hits) with a minimum relative score of -16,610 (corresponding to  $\sim 10^5$  weaker predicted binding affinity) were found in the human genome (hg18). Binding sites of NPC1Right with minimum relative score of -16,610 were found with a spacer of

11-26 bp from each NPC1Left hit. The total relative score of a paired hit is defined as the sum of the NPC1Left and the NPC1Right relative scores and was used to rank the predicted target sites.

Table S2: TALEN Recognition Sequences and the Amino Acid Identity of the Repeat Variable Di-residues (RVDs) in the Corresponding TALENs

| TALEN              | TALEN recognition sequences (bold and underlined) & Amino acid sequence of the RVDs                                                                                                                                                                                                                                                                                                                                                                                     |
|--------------------|-------------------------------------------------------------------------------------------------------------------------------------------------------------------------------------------------------------------------------------------------------------------------------------------------------------------------------------------------------------------------------------------------------------------------------------------------------------------------|
| <b>NPC1 pair 1</b> | <p>5' <b><u>CTGAAGAAAGCCCGACT</u></b>TACAGCCAGTAATGTCACCGAAACCATGGGCATT<br/>                     3'GACTTCTTTTCGGGCTGAAT<b><u>GTCGGTCATTACAGTGGCTTTGGTACCCGTAA</u></b></p> <p>HD NG NN NI NI NN NI NI NI NN HD HD HD NN NI HD NG<br/>                     (left TALEN)</p> <p>NI NI NG NN HD HD HD NI NG NN NN NG NG NG HD NN NN NG<br/>                     (right TALEN)</p>                                                                                           |
| <b>NPC1 pair 2</b> | <p>5'<b><u>GACGCTCTGAAGAAAGCCC</u></b>GACTTATAGCCAGTAATGTCACCGAAACCATG<br/>                     GGC<br/>                     3'<br/>                     CTGCGAGACTTCTTTTCGGGCTGAATATCGGTCATT<b><u>TACAGTGGCTTTGGTACCC</u></b><br/> <b><u>G</u></b></p> <p>NN NI HD NN HD NG HD NG NN NI NI NN NI NI NI NN HD HD HD<br/>                     (left TALEN)</p> <p>NN HD HD HD NI NG NN NN NG NG NG HD NN NN NG NN NI HD NI NG<br/>                     (right TALEN)</p> |
| <b>NPC1 pair 3</b> | <p>5'<b><u>GACGCTCTGAAGAAAGCC</u></b>GACTTATAGCCAGTAATGTCACCGAAACCATGG<br/>                     GC<br/>                     3'CTGCGAGACTTCTTTTCGGGCTGAATATCGGTCATT<b><u>TTACAGTGGCTTTGGTACC</u></b><br/> <b><u>CG</u></b></p> <p>NN NI HD NN HD NG HD NG NN NI NI NN NI NI NI NN HD HD<br/>                     (left TALEN)</p> <p>NN HD HD HD NI NG NN NN NG NG NG HD NN NN NG NN NI HD NI NG<br/>                     (right TALEN)</p>                              |

Table S3: Predicted TALEN off Target Cutting Sides

| Location | Spacer Length | Pair 1 match (%)              | Pair 2 match (%)              | Combined Score |
|----------|---------------|-------------------------------|-------------------------------|----------------|
| chr2     | 23            | CcaAAGAAAaCCcACa<br>(70.59)   | AAaaCCCAaGaTTTCGtT<br>(72.22) | -19360         |
| chr7     | 12            | CTcAAaAAAaCaaaACa<br>(58.82)  | AATGCCCATGaTTTCtcc<br>(77.78) | -22165         |
| chr3     | 18            | aaGAAaAAAaCCCaAaa<br>(66.67)  | AATaCCCATaaTTcCatT<br>(66.67) | -22930         |
| chrX     | 26            | CTGAAGAAActaCCaAaT<br>(70.59) | AATGCCcCaGaTTTCcaT<br>(72.22) | -23443         |
| chr4     | 24            | CaGcAGAcAaCCCaACT<br>(70.59)  | AcTGCCCATatTTTaatT<br>(66.67) | -25144         |
| chr10    | 24            | CTGAAGAAcaaCCcACT<br>(76.47)  | AATcaCCATaaTTataaT<br>(55.56) | -25180         |
| chr1     | 17            | CTGAAacAAaCCcACa<br>(70.59)   | cATGCcATaGTTcCaGc<br>(66.67)  | -25307         |
| chr2     | 26            | CTaAAcAAAcaCCaAaa<br>(58.82)  | AATGCCCATtGccTCaaT<br>(72.22) | -25375         |
| chr17    | 12            | CTGAAaAAAaCCcAac<br>(70.59)   | AAaaCaaATGGTTTCaca<br>(61.11) | -25537         |
| chr14    | 13            | aTGAAGAAAGCCCaAta<br>(76.47)  | AATaCCaATatTTTaGaT<br>(66.67) | -25648         |

### Illumina sequencing and CNV analysis

Illumina whole-genome genotyping and copy number variation (CNV) analysis was performed using a standard protocol. 40-nt Illumina reads were mapped to the human genome with bowtie2 allowing 1 mismatch in the seed. After splitting the autosomes into 10kb windows (overlapping by 5kb), read coverage across each window was calculated and then scaled by the total number of mapped reads per sample. Counts were log-transformed, mean-centered by window, and Pearson correlation was calculated between

samples, which were then hierarchically clustered using average linkage. Mapped 40-nt Illumina reads were used to identify copy number variants (CNVs) throughout the autosomes using the CNV-seq package (<http://www.ncbi.nlm.nih.gov/pubmed/19267900>) from R. A CNV was defined relative to a two-sample comparison, with the minimum CNV width set as 30kb, and the total CNV width for each comparison was calculated. These total CNV widths were used to hierarchically cluster (with average linkage) the samples.

### **Electron microscopy analysis**

Cells were fixed in 2.5% glutaraldehyde, 3% paraformaldehyde with 5% sucrose in 0.1 M sodium cacodylate buffer (pH 7.4), pelleted, and post-fixed in 1% OsO<sub>4</sub> in veronal-acetate buffer. The cell pellet was stained in block overnight with 0.5% uranyl acetate in veronal-acetate buffer (pH 6.0), then dehydrated and embedded in Embed-812 resin. Sections were cut on a Reichert Ultracut E microtome with a Diatome diamond knife at thickness setting of 50 nm, stained with uranyl acetate and lead citrate. The sections were examined using a FEI Tecnai spirit at 80 KV and photographed with an AMT ccd camera. Analysis of the number of autophagic vacuoles (AVs) were performed on >30 electron micrographs per experimental sample as described previously (Yu et al., 2005).

### **Autophagy Inducing Chemical Compounds**

To test the possibility of induce autophagy using small molecules we performed a candidate drug screen including described mTOR independent autophagy inducers (Sarkar, 2013).

Table S4: Small Molecule Autophagy Inducers and Tested Concentrations

| <b>Autophagy Inducer</b>                     | <b>Mechanism of Action</b>                     | <b>Concentration used<br/>In iPSC-derived<br/>Cultures</b> | <b>Induction of<br/>Autophagy</b> |
|----------------------------------------------|------------------------------------------------|------------------------------------------------------------|-----------------------------------|
| Rapamycin (Rap)<br>(Blommaart et al., 1995)  | mTORC1 Inhibitor                               | 200 nM*                                                    | No (hep/ neuro)                   |
|                                              |                                                | 400 nM                                                     | No (hep/ neuro)                   |
|                                              |                                                | 500 nM                                                     | Yes (hep/ neuro)                  |
|                                              |                                                | 800 nM                                                     | cell death                        |
| Carbamazepine (CBZ)<br>(Sarkar et al., 2005) | Inositol and IP <sub>3</sub><br>reducing agent | 50 µM*                                                     | Light (hep/ neuro)                |
|                                              |                                                | 100 µM                                                     | Yes (hep/ neuro)                  |
|                                              |                                                | 500 µM                                                     | cell death                        |
| Verapamil (Ver)<br>(Williams et al., 2008)   | Ca <sup>2+</sup> channel blocker               | 1 µM*                                                      | No (hep/ neuro)                   |
|                                              |                                                | 5 µM                                                       | only in neurons                   |
|                                              |                                                | 100 µM                                                     | cell death                        |
| Trehalose (Tre)<br>(Sarkar et al., 2007a)    | unknown                                        | 1 mM                                                       | No (hep/ neuro)                   |
|                                              |                                                | 10 mM                                                      | only in neurons                   |
|                                              |                                                | 100 mM*                                                    | No (hep/ neuro)                   |
| SMER28<br>(Sarkar et al., 2007b)             | unknown                                        | 50 µM*                                                     | No (hep)/ n/a (neuro)             |
|                                              |                                                | 100 µM                                                     | No (hep)/ n/a (neuro)             |
|                                              |                                                | 500 µM                                                     | No (hep)/ n/a (neuro)             |

\* Concentrations normally used in cell culture; n/a – not tested

### **Analysis of autophagosome synthesis by LC3-II levels using bafilomycin A<sub>1</sub>**

Autophagic flux involves the complete flow of the autophagosomes from their formation to fusion with lysosomes. Constitutive autophagy occurs in all mammalian cell types under basal conditions, where the synthesis of autophagosomes and autophagosomes–lysosome fusion occur at a normal rate. As the steady state levels of LC3-II are affected both by synthesis and degradation, effects on autophagy are assessed by clamping LC3-II/autophagosome degradation with a saturating concentration of bafilomycin A<sub>1</sub>. Bafilomycin A<sub>1</sub> inhibits the vacuolar H<sup>+</sup> ATPase (V-ATPase) and prevents acidification of lysosomes, thereby inhibiting LC3-II degradation and subsequently blocks

autophagosomes–lysosome fusion, resulting in increased LC3-II levels compared to the basal (untreated) state (Klionsky et al., 2008) This is a well–established method for monitoring autophagosome synthesis (Yamamoto et al., 1998). Autophagosome synthesis was analyzed by measuring LC3-II levels relative to actin (loading control) in the presence of a saturating concentration of 400 nM bafilomycin A<sub>1</sub>, treated for the last 6-8 h prior to harvesting the cells for immunoblot analysis (Klionsky et al., 2012; Klionsky et al., 2008; Rubinsztein et al., 2012). Cells were lysed and subjected to SDS–PAGE and immunoblot analysis with anti-LC3 antibody.



**REFERENCES**

- Blommaart, E.F., Luiken, J.J., Blommaart, P.J., van Woerkom, G.M., and Meijer, A.J. (1995). Phosphorylation of ribosomal protein S6 is inhibitory for autophagy in isolated rat hepatocytes. *J Biol Chem* 270, 2320-2326.
- Brambrink, T., Foreman, R., Welstead, G.G., Lengner, C.J., Wernig, M., Suh, H., and Jaenisch, R. (2008). Sequential expression of pluripotency markers during direct reprogramming of mouse somatic cells. *Cell Stem Cell* 2, 151-159.
- Funakoshi, N., Duret, C., Pascussi, J.M., Blanc, P., Maurel, P., Daujat-Chavanieu, M., and Gerbal-Chaloin, S. (2011). Comparison of hepatic-like cell production from human embryonic stem cells and adult liver progenitor cells: CAR transduction activates a battery of detoxification genes. *Stem Cell Rev* 7, 518-531.
- Hockemeyer, D., Soldner, F., Cook, E.G., Gao, Q., Mitalipova, M., and Jaenisch, R. (2008). A drug-inducible system for direct reprogramming of human somatic cells to pluripotency. *Cell Stem Cell* 3, 346-353.
- Klionsky, D.J., Abdalla, F.C., Abeliovich, H., Abraham, R.T., Acevedo-Arozena, A., Adeli, K., Agholme, L., Agnello, M., Agostinis, P., Aguirre-Ghiso, J.A., *et al.* (2012). Guidelines for the use and interpretation of assays for monitoring autophagy. *Autophagy* 8, 445-544.
- Klionsky, D.J., Elazar, Z., Seglen, P.O., and Rubinsztein, D.C. (2008). Does bafilomycin A1 block the fusion of autophagosomes with lysosomes? *Autophagy* 4, 849-950.
- Lengner, C.J., Gimelbrant, A.A., Erwin, J.A., Cheng, A.W., Guenther, M.G., Welstead, G.G., Alagappan, R., Frampton, G.M., Xu, P., Muffat, J., *et al.* (2010). Derivation of pre-X inactivation human embryonic stem cells under physiological oxygen concentrations. *Cell* 141, 872-883.

Marchetto, M.C., Carromeu, C., Acab, A., Yu, D., Yeo, G.W., Mu, Y., Chen, G., Gage, F.H., and Muotri, A.R. (2010). A model for neural development and treatment of Rett syndrome using human induced pluripotent stem cells. *Cell* *143*, 527-539.

Moscou, M.J., and Bogdanove, A.J. (2009). A simple cipher governs DNA recognition by TAL effectors. *Science* *326*, 1501.

Rubinsztein, D.C., Codogno, P., and Levine, B. (2012). Autophagy modulation as a potential therapeutic target for diverse diseases. *Nat Rev Drug Discov* *11*, 709-730.

Sarkar, S., Davies, J.E., Huang, Z., Tunnacliffe, A., and Rubinsztein, D.C. (2007a). Trehalose, a novel mTOR-independent autophagy enhancer, accelerates the clearance of mutant huntingtin and alpha-synuclein. *J Biol Chem* *282*, 5641-5652.

Sarkar, S., Floto, R.A., Berger, Z., Imarisio, S., Cordenier, A., Pasco, M., Cook, L.J., and Rubinsztein, D.C. (2005). Lithium induces autophagy by inhibiting inositol monophosphatase. *J Cell Biol* *170*, 1101-1111.

Sarkar, S., Perlstein, E.O., Imarisio, S., Pineau, S., Cordenier, A., Maglathlin, R.L., Webster, J.A., Lewis, T.A., O'Kane, C.J., Schreiber, S.L., *et al.* (2007b). Small molecules enhance autophagy and reduce toxicity in Huntington's disease models. *Nat Chem Biol* *3*, 331-338.

Si-Tayeb, K., Noto, F.K., Nagaoka, M., Li, J., Battle, M.A., Duris, C., North, P.E., Dalton, S., and Duncan, S.A. (2010). Highly efficient generation of human hepatocyte-like cells from induced pluripotent stem cells. *Hepatology* *51*, 297-305.

Soldner, F., Hockemeyer, D., Beard, C., Gao, Q., Bell, G.W., Cook, E.G., Hargus, G., Blak, A., Cooper, O., Mitalipova, M., *et al.* (2009). Parkinson's disease patient-derived induced pluripotent stem cells free of viral reprogramming factors. *Cell* *136*, 964-977.

Sommer, C.A., and Mostoslavsky, G. (2010). Experimental approaches for the generation of induced pluripotent stem cells. *Stem Cell Res Ther* 1, 26.

Takahashi, K., Tanabe, K., Ohnuki, M., Narita, M., Ichisaka, T., Tomoda, K., and Yamanaka, S. (2007). Induction of pluripotent stem cells from adult human fibroblasts by defined factors. *Cell* 131, 861-872.

Williams, A., Sarkar, S., Cuddon, P., Ttofi, E.K., Saiki, S., Siddiqi, F.H., Jahreiss, L., Fleming, A., Pask, D., Goldsmith, P., *et al.* (2008). Novel targets for Huntington's disease in an mTOR-independent autophagy pathway. *Nat Chem Biol* 4, 295-305.

Yamamoto, A., Tagawa, Y., Yoshimori, T., Moriyama, Y., Masaki, R., and Tashiro, Y. (1998). Bafilomycin A1 prevents maturation of autophagic vacuoles by inhibiting fusion between autophagosomes and lysosomes in rat hepatoma cell line, H-4-II-E cells. *Cell Struct Funct* 23, 33-42.

Yu, W.H., Cuervo, A.M., Kumar, A., Peterhoff, C.M., Schmidt, S.D., Lee, J.H., Mohan, P.S., Mercken, M., Farmery, M.R., Tjernberg, L.O., *et al.* (2005). Macroautophagy--a novel Beta-amyloid peptide-generating pathway activated in Alzheimer's disease. *J Cell Biol* 171, 87-98.

**Supplemental Note**

**Statistical Analyses (*p* values) of Main Figures**

**Figure 1: Generation and Characterization of Patient-Specific NPC1 iPSCs**

(C) FACS analysis of cell viability and apoptosis in hepatic cultures. Graphical data (right panel) represent mean  $\pm$  SE (n = 3). *p* values compared to Control-1: 0.0116 (NPC1-1); 0.0216 (NPC1-2), and Control-2; 0.0163 (NPC1-1); 0,0236 (NPC1-2).

(D) Analysis of cell death in TujI-positive neurons. Graphical data (right panel) represent  $\pm$ SE (n = 3). *p* values compared to Control-1: 0.001 (NPC1-2#9); 0.0066, (NPC1-2#26), and Control-2#13: 0.0015 (NPC1-2#9); 0.0056 (NPC1-2#26).

**Figure 4. Genetic Correction of Autophagy Phenotype in NPC1 iPSC-derived cells**

(A) Quantification of p62 and LC3-II levels in hepatic cultures: Graphical data represent mean  $\pm$  SE (n = 4). *p* values compared to Control-1: 0.0.0886 (LC3-II, Control-2), 0.0002 (LC3-II, NPC1-1), <0.0001 (LC3-II, NPC1-2); 0.0736 (p62, Control-2), <0.0001 (p62, NPC1-1), 0.002 (p62, NPC1-2).

(B) Quantification of p62 and LC3-II levels in neuronal cultures: Graphical data represent mean  $\pm$  SE (n = 4). *p* values compared to Control-2: 0.0077 (LC3-II, NPC1-1), 0.0478 (LC3-II, NPC1-2); 0.0056 (p62, NPC1-1), 0.0212 (p62, NPC1-2).

(C) Quantification of LC3-II levels in hepatic cultures: Graphical data represent mean  $\pm$  SE (n = 3). *p* values of LC3-II levels compared to Control-2 untreated (– BafA<sub>1</sub>) sample: 0.0237 (NPC1-1 – BafA<sub>1</sub>); 0.0356 (NPC1-2 – BafA<sub>1</sub>). *p* values of LC3-II levels compared to Control-2 + BafA<sub>1</sub> sample: 0.12 (NPC1-1 + BafA<sub>1</sub>); 0.1549 (NPC1-2 + BafA<sub>1</sub>).

(D) Quantification of LC3-II levels in neuronal cultures: Graphical data represent mean  $\pm$  SE (n = 3). *p* values of LC3-II levels compared to Control-2 untreated (– BafA<sub>1</sub>) sample: 0.0488 (NPC1 – BafA<sub>1</sub>). *p* values of LC3-II levels compared to Control-2 + BafA<sub>1</sub> sample: 0.0735 (NPC1 + BafA<sub>1</sub>).

(E) Quantification of p62 and LC3-II levels in hepatic cultures: Graphical data represent mean  $\pm$  SE (n = 3). *p* values compared to Control sample: 0.0269 (p62, NPC1-2), 0.8043 (p62, NPC1-2-Corr); 0.0457 (LC3-II, NPC1-2), 0.4712 (LC3-II, NPC1-2-Corr). *p* values compared to NPC1-2 sample: 0.0298 (p62, NPC1-2-Corr), 0.0439 (LC3-II, NPC1-2-Corr).

(F) Quantifications of p62 and LC3-II levels in neuronal cultures: Graphical data represent mean  $\pm$  SE (n = 3). *p* values compared to Control sample: 0.0286 (p62, NPC1-2), 0.1449 (p62, NPC1-2-Corr); 0.0327 (LC3-II, NPC1-2), 0.4266 (LC3-II, NPC1-2-Corr). *p* values compared to NPC1-2 sample: 0.0107 (p62, NPC1-2-Corr), 0.0095 (LC3-II, NPC1-2-Corr).

(G) Quantification of autophagic vacuoles in electron microscopy images in hepatic-like cells. Graphical data represents mean  $\pm$  SE (n = 3). *p* values compared to NPC1-2: 0.0169 (Control); 0.004 (NPC1-2-Corr).

**Figure 5. Chemical Correction of Autophagy Phenotype in NPC1 iPSC-derived cells**

(A) Quantification of p62 levels in hepatic cultures, treated with either DMSO (vehicle control) or rapamycin (Rap): Graphical data represent mean  $\pm$  SE (n = 3). *p* values compared to Control-2 + DMSO sample: <0.0001 (Control-2 + Rap); 0.0003 (NPC1-1 + DMSO); 0.0489 (NPC1-1 + Rap); 0.0008 (NPC1-2 + DMSO); 0.0686 (NPC1-2 + Rap). *p* values compared to NPC1-1 + DMSO sample: 0.0007 (NPC1-1 + Rap). *p* values compared to NPC1-2 + DMSO sample: 0.0007 (NPC1-2 + Rap).

(B) Quantification of p62 levels in hepatic cultures after treatment with autophagy-inducing compounds: Graphical data represent mean  $\pm$  SE (n = 3). *p* values compared to NPC1 UT sample: <0.0001 (Rap); <0.0001 (CBZ); 0.4522 (Ver); 0.8079 (Tre); 0.4156 (SMER28).

(C) Quantification of p62 levels in hepatic cultures, treated with CBZ and HP- $\beta$ -Cyclodextrin (HP- $\beta$ -CD) as indicated. Graphical data represent mean  $\pm$  SE (n = 3). *p* values compared to NPC1 UT samples: 0.5628 (HP- $\beta$ -CD); 0.0002 (CBZ); 0.0065 (HP- $\beta$ -CD + CBZ). *p* values compared to NPC1 + HP- $\beta$ -CD sample: 0.0189 (HP- $\beta$ -CD + CBZ).

(E) Analysis of cell death in hepatic cultures after compound treatment. Graphical data represent mean  $\pm$  SE (n = 3). *p* values compared to NPC1 UT samples: 0.0011 (Control UT); 0.5812 (HP- $\beta$ -CD); 0.0036 (Rap); 0.7494 (Rap + HP- $\beta$ -CD); 0.002 (CBZ); 0.0150 (CBZ + HP- $\beta$ -CD).

(F) Quantification of p62 levels neuronal cultures after treatment with autophagy-inducing compounds: Graphical data represent mean  $\pm$  SE (n = 3). *p* values compared to NPC1 UT sample: 0.0156 (Rap); 0.0208 (CBZ); 0.0075 (Ver); 0.0204 (Tre).

(G) Analysis of cell death in neuronal cultures. Graphical data represent mean  $\pm$  SE (n = 6). *p* values compared to NPC1-2#26 UT: <0.0001 (Control-2#13 UT); 0.004 (HP- $\beta$ -CD); < 0,0001 (Rap); < 0.0001 (Rap + HP- $\beta$ -CD); < 0.0001 (CBZ); < 0.0001 (CBZ + HP- $\beta$ -CD); 0.0002 (Tre); <0.0001 (Ver).
